# Supplementary material for: Visible-light-mediated C(sp3)–H functionalization of alkyl arylacetates: an easy approach to S-benzyl dithiocarbamate acetates
Source: Royal Society of Chemistry journal article supplement (doi:10.1039/d2nj05285g), 2022-12-22

## Supporting Information

### Visible-Light-mediated C(sp<sup>3</sup>)-H functionalization of Alkyl Arylacetates: An Easy Approach to *S*-Benzyl Dithiocarbamate Acetates

Mahesh Kumar,<sup>a</sup> Ramesh Kumar Vishwakarma,<sup>a</sup> Preeti,<sup>a</sup> and Krishna Nand Singh\*<sup>a</sup>

Department of Chemistry, Institute of Science,  
Banaras Hindu University, Varanasi-21005, India

\*E-mail: knsingh@bhu.ac.in; knsinghbhu@yahoo.co.in

# Table of Contents

|                                                                                                                                      |            |
|--------------------------------------------------------------------------------------------------------------------------------------|------------|
| <b>1. General Information</b>                                                                                                        | <b>S1</b>  |
| <b>2. General Procedure for the Synthesis of Products 4a-4t</b>                                                                      | <b>S1</b>  |
| <b>3. Physical and Spectral Data of the Products 4a-4t and A</b>                                                                     | <b>S2</b>  |
| <b>4. References</b>                                                                                                                 | <b>S9</b>  |
| <b>5. Crystallographic Data for the Product 4h</b>                                                                                   | <b>S10</b> |
| <b>6. Copies of <math>^1\text{H}</math>, <math>^{13}\text{C}</math> and <math>^{19}\text{F}</math> Spectra of the Products 4a-4t</b> | <b>S12</b> |
| <b>7. HRMS of Pyrrolidine-1-carbodithioic acid (A) and pyrrolidine-1-carbothioic dithioperoxyanhydride (B):</b>                      | <b>S34</b> |

## 1. General Information:

All the reagents were purchased from Sigma-Aldrich, Alfa Aesar, and E. Merck, and were used as received.  $^1\text{H}$ ,  $^{13}\text{C}$  and  $^{19}\text{F}$  Spectra were recorded on a JEOL ECZ 500R FT NMR spectrometer ( $^1\text{H}$  NMR at 500 MHz,  $^{13}\text{C}$  NMR at 125 MHz, &  $^{19}\text{F}$  NMR at 471 MHz). Chemical shifts for protons and carbons are reported in parts per million downfield from tetramethylsilane, and are referenced to the residual deuterium in the solvent ( $^1\text{H}$  NMR:  $\text{CDCl}_3$  at 7.26 ppm) and carbon of the solvent peak ( $^{13}\text{C}$  NMR:  $\text{CDCl}_3$  at 77.160 ppm) respectively. NMR data are represented as follows: chemical shift, multiplicity (s = singlet, d = doublet, t = triplet, dd = double doublet, brs = broad singlet, and m = multiplet), coupling constant (J) (Hz), and integration. Mass spectra were recorded on a SCIEX X500R QTOF mass spectrometer. IR spectra were recorded on Perkin Elmer FT-IR spectrometer. Analytical thin layer chromatography (TLC) was performed on Merck Kieselgel 60 GF 254 plates (thickness 0.25 mm). Visualization of TLC was performed with a 254 nm UV lamp, and by staining in  $\text{I}_2$  chamber. Organic solutions were concentrated under reduced pressure using a Büchi rotary evaporator. Purification of the crude products was done by column chromatography using silica gel 100–200 mesh. All the reactions were carried out in oven-dried open glass vessels. Yield refers to the isolated analytically pure material.

## 2. General Procedure for the Synthesis of Products 4a-4t:

A mixture of amine (**3**, 1.2 mmol), carbon disulfide (**2**, 2.5 mmol) and DMF (2 mL), contained in a 25-mL borosilicate RB flask, was stirred at room temperature for 5 minutes followed by the addition of alkyl arylacetates (**1**, 1 mmol), Eosin Y (5 mol%), iodine (20 mol %) and  $\text{K}_2\text{CO}_3$  (2 equiv.). The contents were stirred and irradiated by white LED (400-800 nm) under ambient conditions for 20 h. After completion of the reaction (monitored through TLC), the reaction was quenched with a sodium thiosulphate pentahydrate aqueous solution (10 mL), and then extracted with ethyl acetate (3×10 mL). The combined organic phase was dried over anhydrous  $\text{Na}_2\text{SO}_4$  and concentrated using rotary vacuum evaporator. The residue was purified by column chromatography using ethyl acetate/n-hexane as eluent to afford the pure product **4**.

### 3. Physical and Spectral Data of the Products 4a-4t.

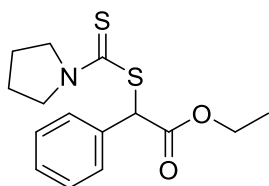

**Ethyl 2-phenyl-2-((pyrrolidine-1-carbonothioyl)thio)acetate (4a):**<sup>1</sup> White solid (72 %), m.p. 114-115°C, <sup>1</sup>H NMR (CDCl<sub>3</sub>, 500 MHz): δ 7.46 (d, *J* = 8.0 Hz, 2H), 7.36-7.30 (m, 3H), 5.84 (s, 1H), 4.32-4.25 (m, 1H), 4.19-4.13 (m, 1H), 3.92 (q, *J* = 6.5 Hz, 2H), 3.74-3.69 (m, 1H), 3.60-3.55 (m, 1H), 2.10-2.03 (m, 2H), 1.99-1.94 (m, 2H), 1.27 (t, *J* = 8.0 Hz, 3H). <sup>13</sup>C NMR (CDCl<sub>3</sub>, 125 MHz): δ 190.6, 170.3, 134.3, 129.0, 128.9, 128.6, 62.2, 58.5, 55.1, 50.7, 26.3, 24.4, 14.2.

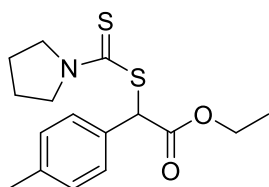

**Ethyl 2-((pyrrolidine-1-carbonothioyl)thio)-2-(p-tolyl)acetate (4b):**<sup>1</sup> White solid (71 %), m.p. 116-117°C, <sup>1</sup>H NMR (CDCl<sub>3</sub>, 500 MHz): δ 7.34 (d, *J* = 8.0 Hz, 2H), 7.15 (d, *J* = 8.0 Hz, 2H), 5.78 (s, 1H), 4.30-4.25 (m, 1H), 4.17-4.11 (m, 1H), 3.91 (q, *J* = 6.5 Hz, 2H), 3.73-3.68 (m, 1H), 3.59-3.54 (m, 1H), 2.33 (s, 3H), 2.07-2.02 (m, 2H), 1.98-1.94 (m, 2H), 1.27 (t, *J* = 7.5 Hz, 3H). <sup>13</sup>C NMR (CDCl<sub>3</sub>, 125 MHz): δ 190.8, 170.4, 138.6, 131.2, 129.8, 128.8, 62.2, 58.2, 55.0, 50.7, 26.3, 24.4, 21.3, 14.2.

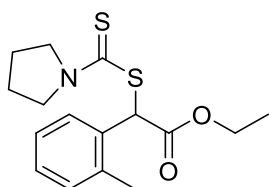

**Ethyl 2-((pyrrolidine-1-carbonothioyl)thio)-2-(o-tolyl)acetate (4c):** Brown liquid (68 %), IR (KBr, 4000-600 cm<sup>-1</sup>):  $\nu_{\max}$  = 2967, 2925, 2872, 1739, 1463, 1435, 1250, 1161, 1095, 1028, 1009, 957; <sup>1</sup>H NMR (CDCl<sub>3</sub>, 500 MHz): δ 7.35 (d, 1H, *J* = 7.5 Hz), 7.22 (d, 2H, *J* = 4.0 Hz), 7.18-7.15 (m, 1H), 6.01 (s, 1H), 4.32-4.26 (m, 1H), 4.18-4.15 (m, 1H), 3.92 (q, *J* = 6.5 Hz, 2H), 3.75-3.72 (m, 1H), 3.59-3.54 (m, 1H), 2.48 (s, 3H), 2.08-2.04 (m, 2H), 2.0-1.96 (m, 2H), 1.27 (t, *J* = 7.0 Hz, 3H). <sup>13</sup>C NMR (CDCl<sub>3</sub>, 125 MHz): δ 191.0, 170.6, 137.2, 132.4, 131.1, 128.6, 128.5, 126.5, 62.2, 55.7, 55.1, 50.7, 26.3, 24.4, 19.9, 14.2. HRMS (TOF-MS) for C<sub>16</sub>H<sub>22</sub>NO<sub>2</sub>S<sub>2</sub> m/z [M + H]<sup>+</sup> calcd: 324.1086, found: 324.1083

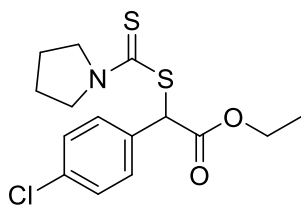

**Ethyl 2-(4-chlorophenyl)-2-((pyrrolidine-1-carbonothioyl)thio)acetate (4d)<sup>1</sup>:** Yellow liquid (70 %), <sup>1</sup>H NMR (CDCl<sub>3</sub>, 500 MHz): δ 7.40 (d, *J* = 9.0 Hz, 2H), 7.32 (d, *J* = 8.5 Hz, 2H), 5.87 (s, 1H), 4.28-4.25 (m, 1H), 4.19-4.14 (m, 1H), 3.90 (q, *J* = 6.5 Hz, 2H), 3.72-3.66 (m, 1H), 3.61- 3.56 (m, 1H), 2.08-2.05 (m, 2H), 1.99-1.95 (m, 2H), 1.26 (t, *J* = 7.0 Hz, 3H). <sup>13</sup>C NMR (CDCl<sub>3</sub>, 125 MHz): δ 190.0, 170.0, 134.56, 133.4, 130.3, 129.2, 62.4, 57.7, 55.2, 50.8, 26.3, 24.4, 14.2.

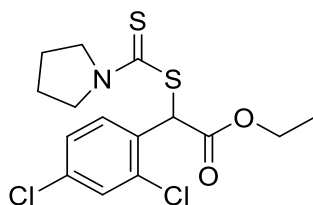

**Ethyl 2-(2,4-dichlorophenyl)-2-((pyrrolidine-1-carbonothioyl)thio)acetate (4e):** Light yellow solid (66 %), m.p. 77-78°C, IR (KBr, 4000-600 cm<sup>-1</sup>): ν<sub>max</sub> = 2967, 2926, 2871, 1738, 1439, 1162, 1100, 1028, 799; <sup>1</sup>H NMR (CDCl<sub>3</sub>, 500 MHz): δ 7.47 (d, *J* = 8.5 Hz, 1H), 7.42 (d, *J* = 9.5 Hz, 1H), 7.23-7.21 (m, 1H), 6.45 (s, 1H), 4.27-4.22 (m, 2H), 3.92 (q, *J* = 6.5 Hz, 2H), 3.73-3.70 (m, 1H), 3.62-3.59 (m, 1H), 2.09-2.05 (m, 2H), 1.99-1.95 (m, 2H), 1.26-1.23 (m, 3H). <sup>13</sup>C NMR (CDCl<sub>3</sub>, 125 MHz): δ 190.0, 169.3, 135.2, 135.0, 132.5, 131.4, 130.0, 127.5, 62.6, 55.7, 55.5, 50.7, 26.3, 24.4, 14.2. HRMS (TOF-MS) for C<sub>15</sub>H<sub>18</sub>NC<sub>2</sub>O<sub>2</sub>S<sub>2</sub> m/z [M + H]<sup>+</sup> calcd: 378.0151, found: 378.0154

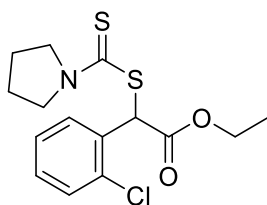

**Ethyl 2-(2-chlorophenyl)-2-((pyrrolidine-1-carbonothioyl)thio)acetate (4f):** Sticky solid (69 %), IR (KBr, 4000-600 cm<sup>-1</sup>): ν<sub>max</sub> = 2976, 2871, 1738, 1463, 1436, 1250, 1219, 1160, 1028, 1008, 956; <sup>1</sup>H NMR (CDCl<sub>3</sub>, 500 MHz): δ 7.52-7.51 (m, 1H), 7.43 (d, 1H, *J* = 8.5 Hz), 7.28-7.23 (m, 2H), 6.46 (s, 1H), 4.27-4.20 (m, 2H), 3.94 (q, *J* = 6.0 Hz, 2H), 3.77-3.72 (m, 1H), 3.63-3.58 (m, 1H), 2.09-2.06 (m, 2H), 2.0-1.96 (m, 2H), 1.27-1.24 (m, 3H). <sup>13</sup>C NMR (CDCl<sub>3</sub>, 125 MHz): δ 190.4, 169.7, 134.4, 133.3, 130.5, 130.1, 129.7, 127.2, 62.4, 56.1, 55.4, 50.7, 26.2, 24.4, 14.2. HRMS (TOF-MS) for C<sub>15</sub>H<sub>19</sub>ClNO<sub>2</sub>S<sub>2</sub> m/z [M + H]<sup>+</sup> calcd: 344.0540, found: 344.0546.

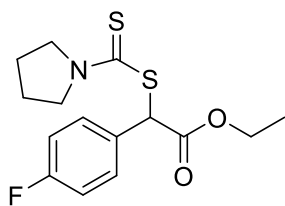

**Ethyl 2-(4-fluorophenyl)-2-((pyrrolidine-1-carbonothioyl)thio)acetate (4g):** Sticky solid ; (65 %), IR (KBr, 4000-600  $\text{cm}^{-1}$ ):  $\nu_{\text{max}} = 2977, 2926, 2873, 1737, 1603, 1508, 1463, 1436, 1223, 1160, 1010, 1027, 957$ ;  $^1\text{H}$  NMR ( $\text{CDCl}_3$ , 500 MHz):  $\delta$  7.45-7.42 (m, 2H), 7.04 (t,  $J = 8.0$  Hz, 2H), 5.85 (s, 1H), 4.29-4.25 (m, 1H), 4.19-4.14 (m, 1H), 3.91 (q,  $J = 6.5$  Hz, 2H), 3.71-3.68 (m, 1H), 3.62-3.57 (m, 1H), 2.08-2.05 (m, 2H), 1.98-1.95 (m, 2H), 1.27-1.24 (m, 3H).  $^{13}\text{C}$  NMR ( $\text{CDCl}_3$ , 125 MHz):  $\delta$  190.2, 170.2, 163.8, 161.9, 130.8, 130.7, 116.1, 115.9, 115.5, 115.3, 62.3, 57.6, 55.1, 50.8, 26.3, 24.4, 14.2.  $^{19}\text{F}$  NMR (471 MHz,  $\text{CDCl}_3$ )  $\delta$  -113.1. HRMS (TOF-MS) for  $\text{C}_{15}\text{H}_{19}\text{FNO}_2\text{S}_2$   $m/z$   $[\text{M} + \text{H}]^+$  calcd: 328.0836, found: 328.0831.

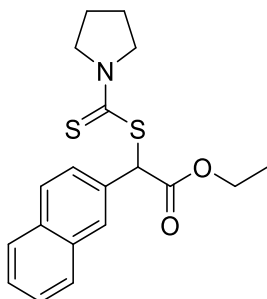

**Ethyl 2-(naphthalen-2-yl)-2-((pyrrolidine-1-carbonothioyl)thio)acetate (4h):** Colourless solid (73 %), m.p. 149-150°C, IR (KBr, 4000-600  $\text{cm}^{-1}$ ):  $\nu_{\text{max}} = 2980, 2948, 1741, 1598, 1510, 1434, 1331, 1260, 1217, 1185, 1162, 1031, 1008, 954$ .  $^1\text{H}$  NMR ( $\text{CDCl}_3$ , 500 MHz):  $\delta$  8.17 (d,  $J = 8.5$  Hz, 1H), 7.88 (dd,  $J = 10.5$  Hz,  $J = 8.0$  Hz, 2H), 7.59-7.57 (m, 2H), 7.53-7.50 (m, 1H), 7.44 (t,  $J = 7.5$  Hz, 1H), 6.7 (s, 1H), 4.35-4.28 (m, 1H), 4.22-4.17 (m, 1H), 3.97-3.92 (q,  $J = 10.5$  Hz, 2H), 3.76-3.71 (m, 1H), 3.54-3.49 (m, 1H), 2.07-1.95 (m, 4H), 1.24 (t,  $J = 6.5$  Hz, 3H).  $^{13}\text{C}$  NMR ( $\text{CDCl}_3$ , 125 MHz):  $\delta$  191.0, 170.6, 137.2, 132.4, 131.1, 128.6, 128.5, 126.5, 62.2, 55.7, 55.1, 50.7, 26.3, 24.4, 19.9, 14.2. HRMS (TOF-MS) for  $\text{C}_{19}\text{H}_{22}\text{NO}_2\text{S}_2$   $m/z$   $[\text{M} + \text{H}]^+$  calcd: 360.1086, found: 360.1093.

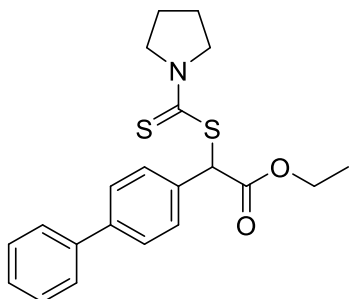

**Ethyl 2-([1,1'-biphenyl]-4-yl)-2-((pyrrolidine-1-carbonothioyl)thio)acetate (4i):** White solid (70 %), m.p. 148-149°C, IR (KBr, 4000-600  $\text{cm}^{-1}$ ):  $\nu_{\text{max}} = 2978, 1731, 1464, 1445, 1282, 1184, 1167, 1103, 1007, 956, 784, 734, 702$ ;  $^1\text{H}$  NMR ( $\text{CDCl}_3$ , 500 MHz):  $\delta$  7.58 (dd,  $J = 8.0$  Hz, 6.5 Hz, 6H), 7.45 (t,  $J = 8.0$  Hz, 2H), 7.36-7.34 (m, 1H), 5.91 (s, 1H),

4.35-4.28 (m, 1H), 4.22-4.15 (m, 1H), 3.92 (brs, 2H), 3.73 (m, 2H), 2.10-2.04 (m, 2H), 2.0 (q,  $J = 7.0$  Hz, 2H), 1.30-1.27 (m, 3H).  $^{13}\text{C}$  NMR ( $\text{CDCl}_3$ , 125 MHz):  $\delta$  190.4, 170.2, 141.6, 140.5, 133.5, 129.3, 128.9, 127.7, 127.2, 62.3, 58.2, 55.1, 50.7, 26.3, 24.4, 14.2. HRMS (TOF-MS) for  $\text{C}_{21}\text{H}_{24}\text{NO}_2\text{S}_2$   $m/z$   $[\text{M} + \text{H}]^+$  calcd: 386.1243, found: 386.1247.

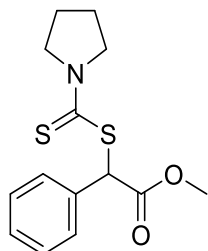

**Methyl 2-phenyl-2-((pyrrolidine-1-carbonothioyl)thio)acetate (4j)<sup>2</sup>:** White solid (70 %), m.p. 114-115°C (lit. 112-113°C),  $^1\text{H}$  NMR ( $\text{CDCl}_3$ , 500 MHz):  $\delta$  7.45-7.44 (m, 2H), 7.37-7.33 (m, 3H), 5.87 (s, 1H), 3.92 (q,  $J = 6.5$  Hz, 2H), 3.76 (s, 3H), 3.73-3.69 (m, 1H), 3.60-3.56 (m, 1H), 2.08-2.05 (m, 2H), 2.0-1.96 (m, 2H).  $^{13}\text{C}$  NMR ( $\text{CDCl}_3$ , 125 MHz):  $\delta$  190.5, 170.8, 134.2, 129.1, 129.0, 128.7, 58.3, 55.1, 53.2, 50.8, 26.3, 24.4.

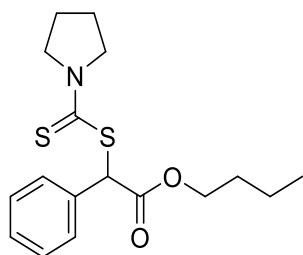

**Butyl 2-phenyl-2-((pyrrolidine-1-carbonothioyl)thio)acetate (4k):** White solid (68 %), m.p. 96-97°C, IR (KBr, 4000-600  $\text{cm}^{-1}$ ):  $\nu_{\text{max}} = 2959, 2872, 1738, 1435, 1261, 1160, 1010, 957$ ;  $^1\text{H}$  NMR ( $\text{CDCl}_3$ , 500 MHz):  $\delta$  7.46 (d,  $J = 8.0$  Hz, 2H), 7.36-7.31 (m, 3H), 5.84 (s, 1H), 4.24-4.19 (m, 1H), 4.13-4.08 (m, 1H), 3.93-3.87 (m, 2H), 3.74-3.69 (m, 1H), 3.61-3.56 (m, 1H), 2.09-2.03 (m, 2H), 1.99 (q,  $J = 7.0$  Hz, 2H), 1.63-1.59 (m, 2H), 1.34-1.29 (m, 2H), 0.89 (t,  $J = 7.5$  Hz, 3H).  $^{13}\text{C}$  NMR ( $\text{CDCl}_3$ , 125 MHz):  $\delta$  190.6, 170.4, 134.5, 129.0, 129.0, 128.6, 66.1, 58.6, 55.1, 50.7, 30.6, 26.3, 24.4, 19.1, 13.8. HRMS (ESI) for  $\text{C}_{17}\text{H}_{24}\text{NO}_2\text{S}_2$   $m/z$   $[\text{M} + \text{H}]^+$  calcd: 338.1243, found: 338.1249.

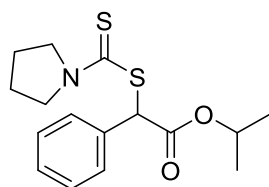

**Isopropyl 2-phenyl-2-((pyrrolidine-1-carbonothioyl)thio)acetate (4l)<sup>2</sup>:** White solid (72%), m.p. 146-147°C (lit. 145-146°C), IR (KBr, 4000-600  $\text{cm}^{-1}$ ):  $\nu_{\text{max}} = 2967, 2924, 2866, 1731, 1464, 1445, 1282, 1184, 1167, 1103$ .  $^1\text{H}$  NMR ( $\text{CDCl}_3$ , 500 MHz): 7.45 (d,  $J = 7.0$  Hz, 2H), 7.35-7.30 (m, 3H), 5.80 (s, 1H), 3.91-3.88 (m, 2H), 3.74-3.69 (m, 1H), 3.60-3.55 (m, 1H), 2.08-2.04 (m, 2H), 1.99-1.95 (m, 2H), 1.31 (d,  $J = 6.0$  Hz, 3H), 1.15 (d,  $J = 6.5$  Hz, 3H).

$^{13}\text{C}$  NMR ( $\text{CDCl}_3$ , 125 MHz):  $\delta$  190.7, 169.7, 134.6, 129.0, 128.9, 128.5, 69.8, 58.7, 55.0, 50.7, 26.3, 24.4, 21.8, 21.6.

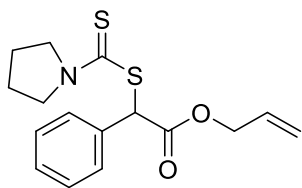

**Allyl 2-phenyl-2-((pyrrolidine-1-carbonothioyl)thio)acetate (4m)<sup>2</sup>**: White solid (68%), m.p. 104-105°C (lit. 102-103°C), IR (KBr, 4000-600  $\text{cm}^{-1}$ ):  $\nu_{\text{max}}$  = 2956, 2869, 1737, 1463, 1436, 1326, 1300, 1283, 1167, 1145, 1014, 984.  $^1\text{H}$  NMR ( $\text{CDCl}_3$ , 500 MHz):  $\delta$  7.46 (d,  $J$  = 7.5 Hz, 2H), 7.35 (d,  $J$  = 8.0 Hz, 3H), 5.91-5.85 (m, 2H), 5.27-5.24 (m, 1H), 5.19 (d,  $J$  = 10.5 Hz, 1H), 4.72-4.69 (m, 1H), 4.63-4.60 (m, 1H), 3.92 (q,  $J$  = 6.5 Hz, 2H), 3.74-3.69 (m, 1H), 3.60-3.55 (m, 1H), 2.08-2.05 (m, 2H), 1.99-1.95 (m, 2H).  $^{13}\text{C}$  NMR ( $\text{CDCl}_3$ , 125 MHz):  $\delta$  190.5, 170.0, 134.2, 131.9, 129.0, 129.0, 128.7, 118.5, 66.6, 58.5, 55.1, 50.7, 26.3, 24.4.

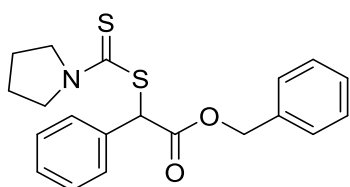

**Benzyl 2-phenyl-2-((pyrrolidine-1-carbonothioyl)thio)acetate (4n)<sup>2</sup>**: Yellow oil (67%),  $^1\text{H}$  NMR ( $\text{CDCl}_3$ , 500 MHz):  $\delta$  7.43-7.41 (m, 2H), 7.32-7.29 (m, 8H), 5.90 (s, 1H), 5.27-5.24 (m, 1H), 5.15-5.12 (m, 1H), 3.91 (q,  $J$  = 6.5 Hz, 2H), 3.73-3.68 (m, 1H), 3.60-3.55 (m, 1H), 2.08-2.05 (m, 2H), 2.0-1.95 (m, 2H).  $^{13}\text{C}$  NMR ( $\text{CDCl}_3$ , 125 MHz):  $\delta$  190.5, 170.2, 135.7, 134.0, 129.0, 129.0, 128.7, 128.5, 128.2, 128.2, 67.7, 58.5, 55.1, 50.7, 26.3, 24.4.

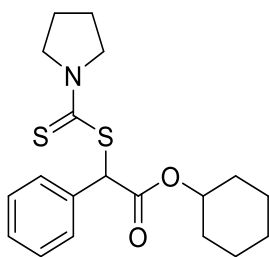

**Cyclohexyl 2-phenyl-2-((pyrrolidine-1-carbonothioyl)thio)acetate (4o)<sup>2</sup>**: White solid (65 %), m.p. 123-124°C; IR (KBr, 4000-600  $\text{cm}^{-1}$ ):  $\nu_{\text{max}}$  = 2933, 2856, 1733, 1435, 1261, 1165, 1012, 799;  $^1\text{H}$  NMR ( $\text{CDCl}_3$ , 500 MHz):  $\delta$  7.45 (d,  $J$  = 7.5 Hz, 2H), 7.33 (d,  $J$  = 8.0 Hz, 3H), 5.82 (s, 1H), 4.86-4.81 (m, 1H), 3.91-3.88 (m, 2H), 3.74-3.69 (m, 1H), 3.60-3.55 (m, 1H), 2.08-2.04 (m, 2H), 1.99-1.94 (m, 2H), 1.74-1.68 (m, 2H), 1.54-1.48 (m, 2H), 1.36-1.25 (m, 6H).  $^{13}\text{C}$  NMR ( $\text{CDCl}_3$ , 125 MHz):  $\delta$  190.7, 169.6, 134.7, 128.8, 128.7, 128.5, 74.5, 58.8, 55.0, 50.7, 31.5, 31.2, 26.3, 25.5, 24.4, 23.7, 23.6. HRMS (ESI) for  $\text{C}_{19}\text{H}_{26}\text{NO}_2\text{S}_2$   $m/z$  [ $\text{M} + \text{H}$ ]<sup>+</sup> calcd: 364.1399, found: 364.1401.



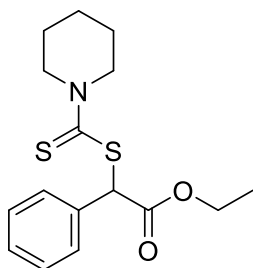

**Ethyl 2-phenyl-2-((piperidine-1-carbonothioyl)thio)acetate (4p)<sup>1</sup>**: White solid (65 %), m.p. 69-70°C, IR (KBr, 4000-600 cm<sup>-1</sup>):  $\nu_{\max}$  = 2925, 2853, 1739, 1479, 1454, 1432, 1365, 1301, 1279, 1240, 1156, 1110, 1030, 1003, 977. <sup>1</sup>H NMR (CDCl<sub>3</sub>, 500 MHz):  $\delta$  7.45 (d,  $J$  = 7.0 Hz, 2H), 7.35-7.31 (m, 3H), 5.79 (s, 1H), 4.32-4.25 (m, 2H), 4.18-4.13 (m, 2H), 3.89-3.81 (m, 2H), 1.69 (s, 6H), 1.27 (t,  $J$  = 7.0 Hz, 3H). <sup>13</sup>C NMR (CDCl<sub>3</sub>, 125 MHz):  $\delta$  193.5, 170.3, 134.1, 129.4, 129.0, 128.7, 62.2, 59.2, 52.9, 24.3, 14.2.

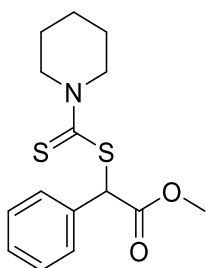

**Methyl 2-phenyl-2-((piperidine-1-carbonothioyl)thio)acetate (4q)<sup>2</sup>**: White solid (65 %), m.p. 70-71°C (lit. 71-72°C), <sup>1</sup>H NMR (CDCl<sub>3</sub>, 500 MHz):  $\delta$  7.45 (d,  $J$  = 8.0 Hz, 2H), 7.35 (d,  $J$  = 6.0 Hz, 3H), 5.80 (s, 1H), 4.36 (brs, 1H), 4.24 (brs, 1H), 4.11 (brs, 1H), 3.90 (s, 1H), 3.82 (s, 1H), 3.76 (s, 3H), 1.69 (s, 6H). <sup>13</sup>C NMR (CDCl<sub>3</sub>, 125 MHz):  $\delta$  193.3, 170.8, 133.8, 129.0, 128.9, 128.7, 58.9, 53.1, 52.9, 51.7, 26.1, 25.4, 24.2.

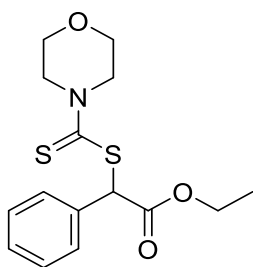

**Ethyl 2-((morpholine-4-carbonothioyl)thio)-2-phenylacetate (4r)<sup>1</sup>**: White solid (66 %), m.p. 100-101°C, IR (KBr, 4000-600 cm<sup>-1</sup>):  $\nu_{\max}$  = 2959, 2923, 2853, 1739, 1455, 1422, 1332, 1305, 1269, 1160, 1105, 1027, 876. <sup>1</sup>H NMR (CDCl<sub>3</sub>, 500 MHz):  $\delta$  7.45-7.43 (m, 2H), 7.35 (d,  $J$  = 7.5 Hz, 3H), 5.78 (s, 1H), 4.30-4.26 (m, 2H), 4.19-4.12 (m, 2H), 3.90 (m, 1H), 3.75 (brs, 4H), 3.65-3.61 (m, 1H), 1.27-1.25 (m, 3H). <sup>13</sup>C NMR (CDCl<sub>3</sub>, 125 MHz):  $\delta$  195.4, 170.0, 133.8, 129.1, 129.0, 128.7, 66.4, 62.3, 59.0, 50.9, 14.2.

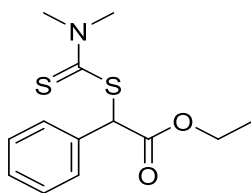

**Ethyl 2-((dimethylcarbamothioyl)thio)-2-phenylacetate (4s):** Yellow liquid (62 %), IR (KBr, 4000-600  $\text{cm}^{-1}$ ):  $\nu_{\text{max}} = 2961, 2922, 2851, 1738, 1497, 1378, 1260, 1155, 1094, 1025, 802$ ;  $^1\text{H}$  NMR ( $\text{CDCl}_3$ , 500 MHz):  $\delta$  7.45 (d,  $J = 6.0$  Hz, 2H), 7.37-7.32 (m, 3H), 5.74 (s, 1H), 4.32-4.26 (m, 1H), 4.17-4.14 (m, 1H), 3.52 (s, 3H), 3.37 (s, 3H), 1.28 (t,  $J = 7.5$  Hz, 3H).  $^{13}\text{C}$  NMR ( $\text{CDCl}_3$ , 125 MHz):  $\delta$  195.1, 170.2, 134.0, 129.1, 129.0, 128.7, 62.2, 59.7, 45.3, 41.7, 14.2. HRMS (ESI) for  $\text{C}_{13}\text{H}_{22}\text{NO}_2\text{S}_2$   $m/z$   $[\text{M} + \text{H}]^+$  calcd: 280.0773, found: 280.0774.

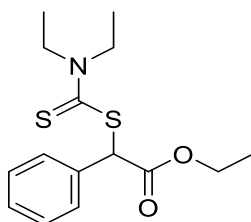

**Ethyl 2-((diethylcarbamothioyl)thio)-2-phenylacetate (4t)<sup>1</sup>:** Yellow liquid (62 %),  $^1\text{H}$  NMR ( $\text{CDCl}_3$ , 500 MHz):  $\delta$  7.45 (d,  $J = 6.0$  Hz, 2H), 7.35 (d,  $J = 7.5$  Hz, 3H), 5.77 (s, 1H), 4.29-4.26 (m, 1H), 3.99 (d,  $J = 7.0$  Hz, 2H), 3.79 (m, 1H), 3.70-3.65 (m, 1H), 1.29 (d,  $J = 6.5$  Hz, 3H), 1.26 (d,  $J = 6.5$  Hz, 6H).  $^{13}\text{C}$  NMR ( $\text{CDCl}_3$ , 125 MHz):  $\delta$  192.9, 170.3, 134.2, 129.1, 129.0, 128.7, 62.1, 59.1, 49.5, 47.1, 14.2, 12.7, 11.7.

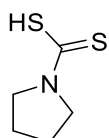

**Pyrrolidine-1-carbodithioic acid (A)<sup>3</sup>:**  $^1\text{H}$  NMR ( $\text{CDCl}_3$ , 500 MHz):  $\delta$  9.72 (brs, 1H), 3.83-3.78 (m, 2H), 3.42-3.37 (m, 2H), 1.91 (brs, 4H).  $^{13}\text{C}$  NMR ( $\text{CDCl}_3$ , 125 MHz):  $\delta$  205.3, 54.0, 45.2, 26.1, 24.6.

#### 4. References.

1. N. Kumar, R. Venkatesh, and J. Kandasamy, *Org. Biomol. Chem.*, **2022**, 20, 6766.
2. Y. Lv, R. Liu, H. Ding, W. Wei, X. Zhao, and L. He, *Org. Chem. Front.*, **2022**, 9, 3486.
3. R. K. Vishwakarma, S. Kumar and K. N. Singh, *Org. Lett.*, 2021, **23**, 4147.

## 5. Crystallographic Data for the Product 4h.

Datablock: mr-24\_auto

Bond precision: C-C = 0.0039 Å, Wavelength=1.54184

Cell: a= 15.3229(3), b= 8.7687(2), c=13.8326(3)

alpha= 90, beta= 104.502(2), gamma= 90

Temperature: 293 K

|                | Calculated      | Reported        |
|----------------|-----------------|-----------------|
| Volume         | 1799.36(7)      | 1799.36(7)      |
| Space group    | P 21/c          | P 21/c          |
| Hall group     | -P 2ybc         | -P 2ybc         |
| Moiety formula | C19 H21 N O2 S2 | ?               |
| Sum formula    | C19 H21 N O2 S2 | C19 H21 N O2 S2 |
| Mr             | 359.49          | 359.49          |
| Dx,g cm-3      | 1.327           | 1.327           |
| Z              | 4               | 4               |
| Mu (mm-1)      | 2.766           | 2.766           |
| F000           | 760.0           | 760.0           |
| F000'          | 764.49          |                 |
| h,k,lmax       | 18,10,16        | 18,10,16        |
| Nref           | 3292            | 3262            |
| Tmin,Tmax      | 0.506,0.575     |                 |
| Tmin'          | 0.393           |                 |

Correction method= Not given

Data completeness= 0.991, Theta(max)= 68.125

R(reflections)= 0.0481(2985), wR2(reflections)= 0.1350 (3262)

S = 1.009, Npar= 218



## 6. Copies of $^1\text{H}$ , $^{13}\text{C}$ and $^{19}\text{F}$ Spectra of the Product 4a-4t.

### $^1\text{H}$ NMR of Ethyl 2-phenyl-2-((pyrrolidine-1-carbonothioyl)thio)acetate (4a):

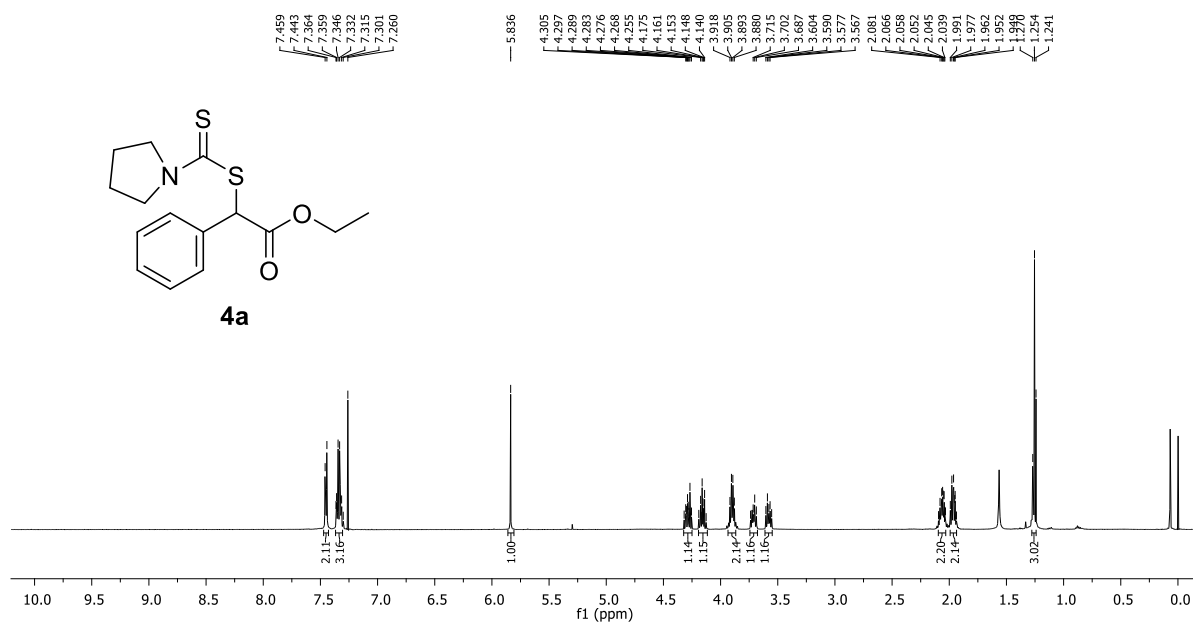

4a (500 MHz, NMR,  $\text{CDCl}_3$ )

### $^{13}\text{C}$ NMR of Ethyl 2-phenyl-2-((pyrrolidine-1-carbonothioyl)thio)acetate (4a):

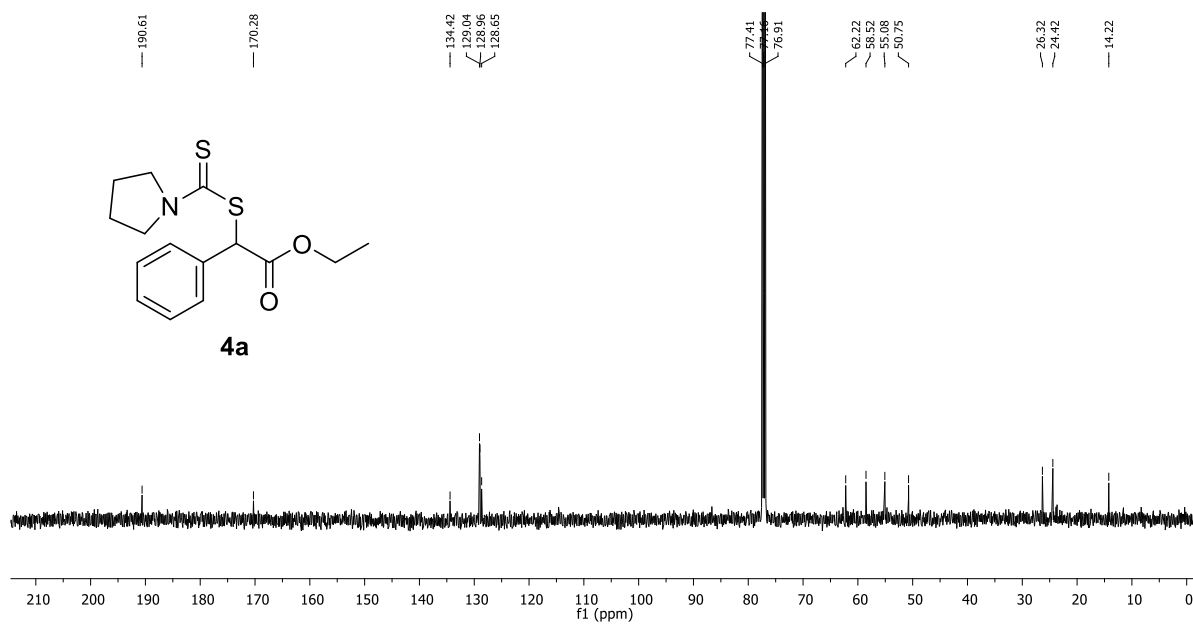



### <sup>1</sup>H NMR of Ethyl 2-((pyrrolidine-1-carbonothioyl)thio)-2-(o-tolyl)acetate (**4c**):

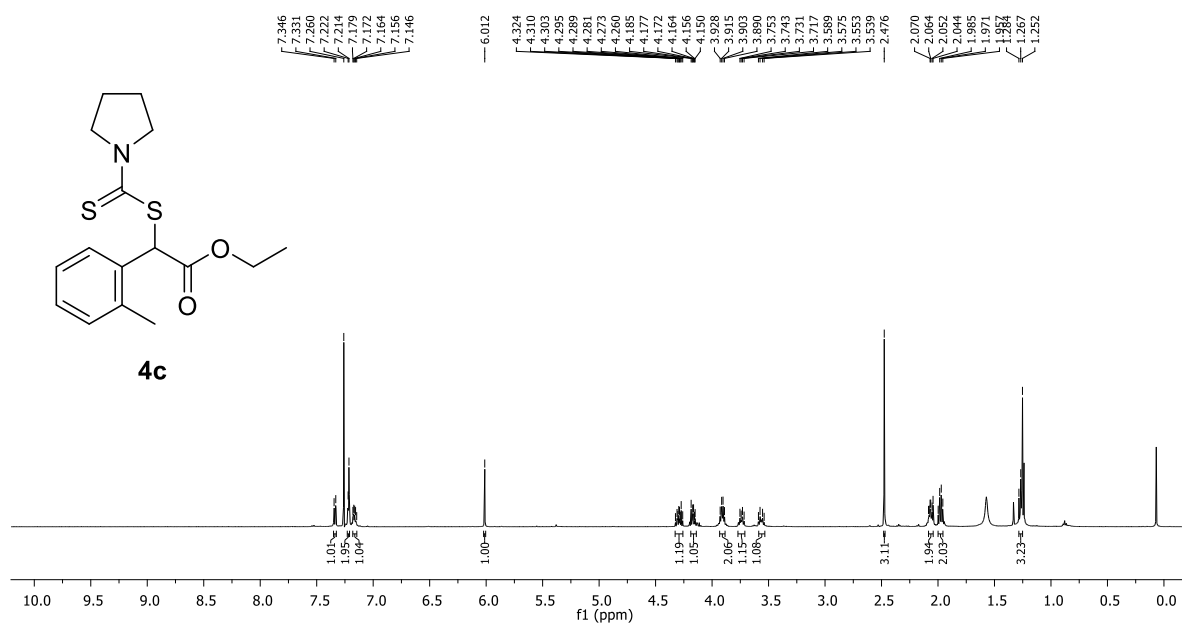

**4c** (500 MHz, NMR, CDCl<sub>3</sub>)

### <sup>13</sup>C NMR of Ethyl 2-((pyrrolidine-1-carbonothioyl)thio)-2-(o-tolyl)acetate (**4c**):

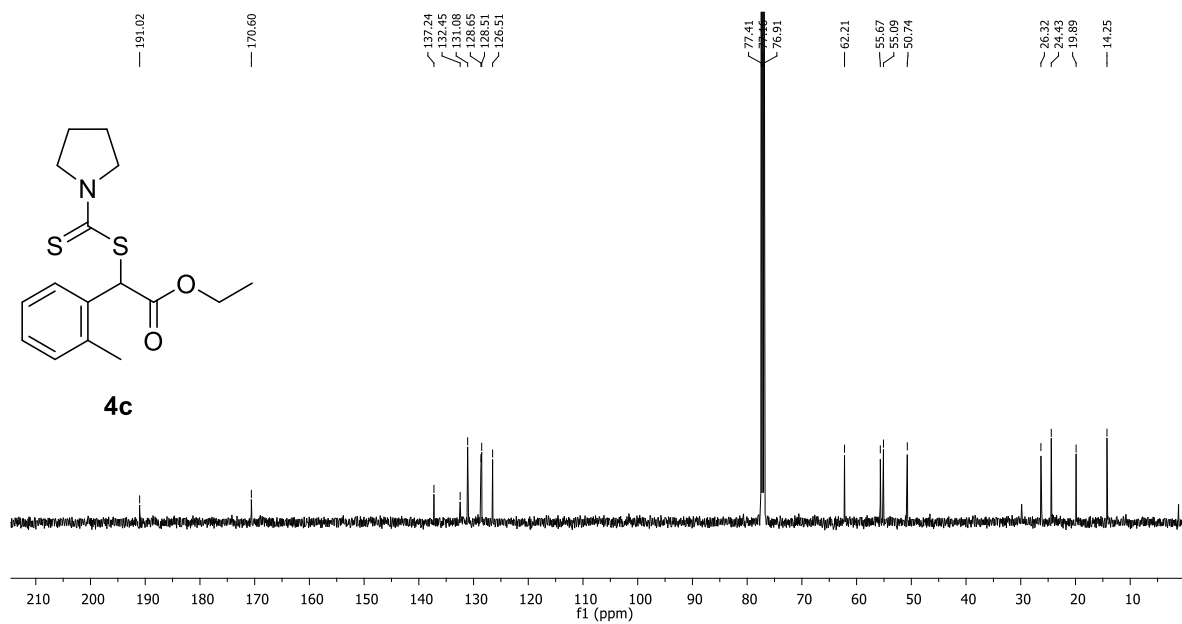



### <sup>1</sup>H NMR of Ethyl 2-(4-chlorophenyl)-2-((pyrrolidine-1-carbonothioyl)thio)acetate (4d):

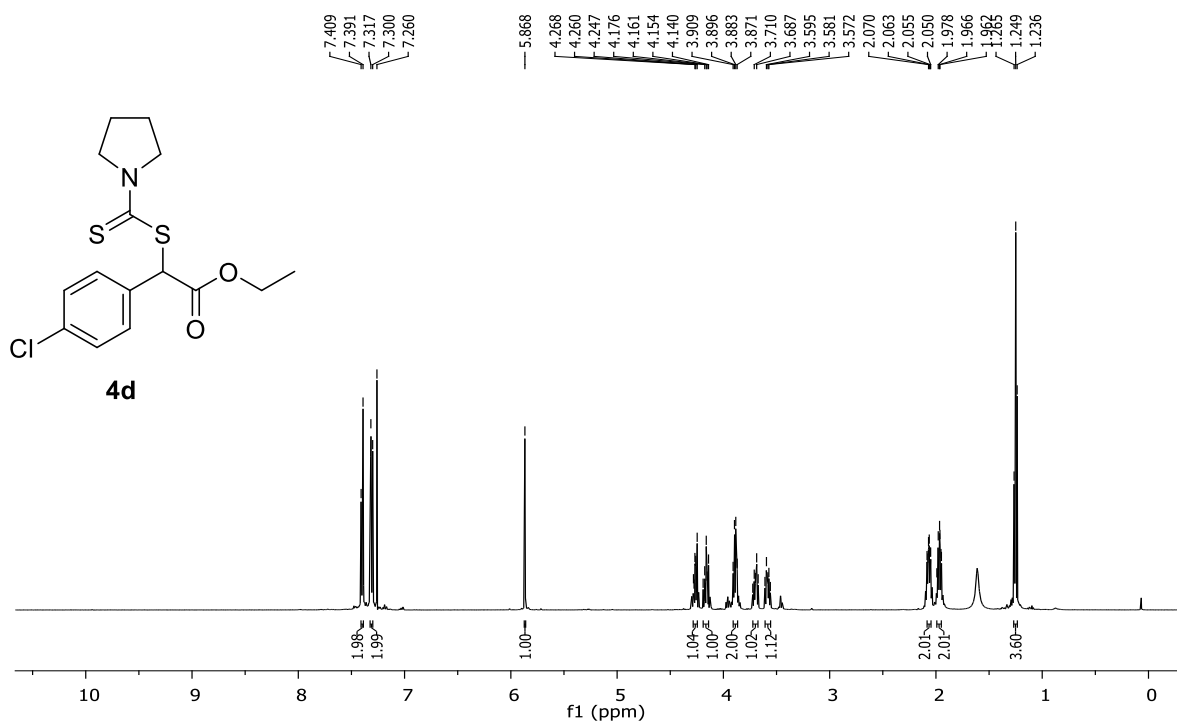

4d (500 MHz, NMR, CDCl<sub>3</sub>)

### <sup>13</sup>C NMR of Ethyl 2-(4-chlorophenyl)-2-((pyrrolidine-1-carbonothioyl)thio)acetate (4d):

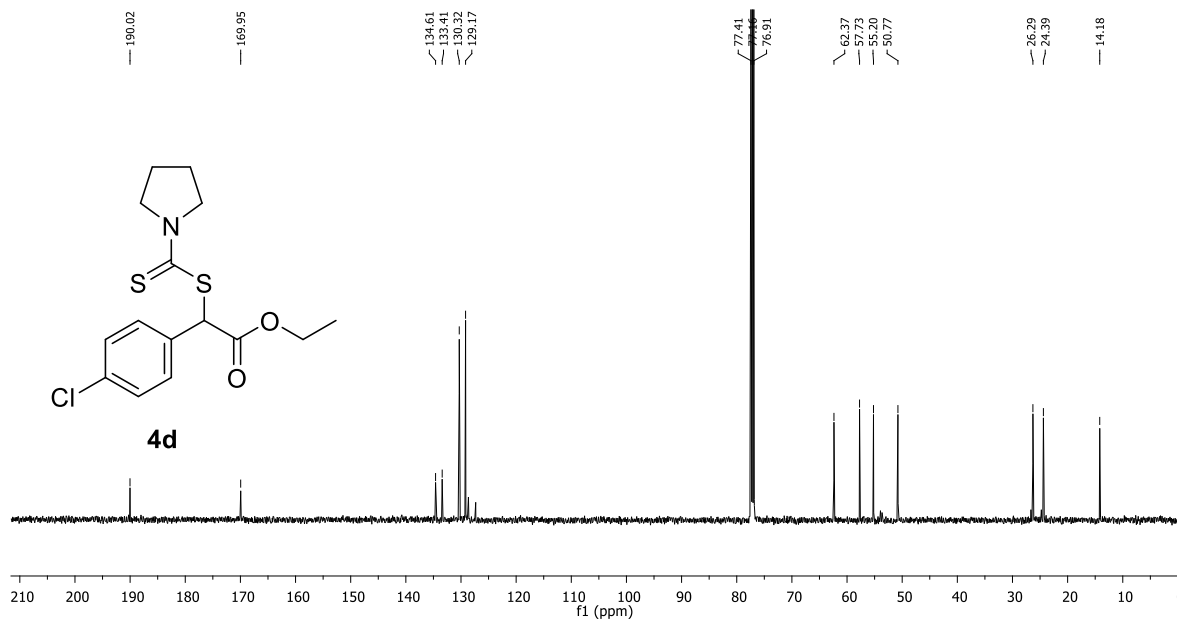

**<sup>1</sup>H NMR of Ethyl 2-(2,4-dichlorophenyl)-2-((pyrrolidine-1-carbonothioyl)thio)acetate (4e):**

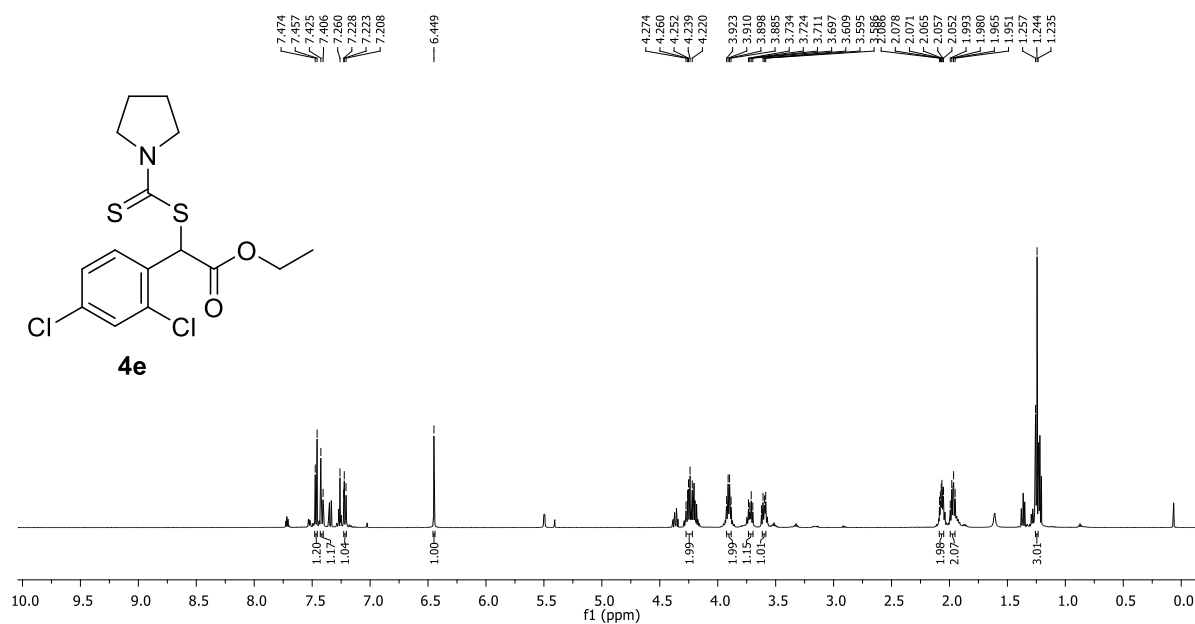

**4e** (500 MHz, NMR, CDCl<sub>3</sub>)

**<sup>13</sup>C NMR of Ethyl 2-(2,4-dichlorophenyl)-2-((pyrrolidine-1-carbonothioyl)thio)acetate (4e):**

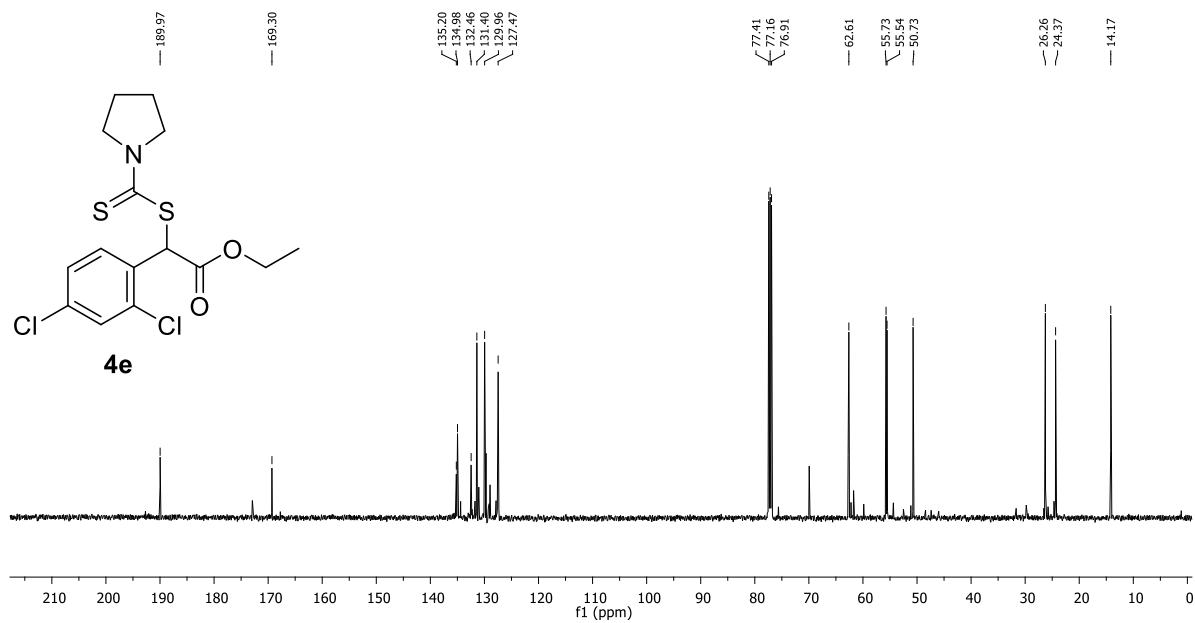

### <sup>1</sup>H NMR of Ethyl 2-(2-chlorophenyl)-2-((pyrrolidine-1-carbonothioyl)thio)acetate (4f):

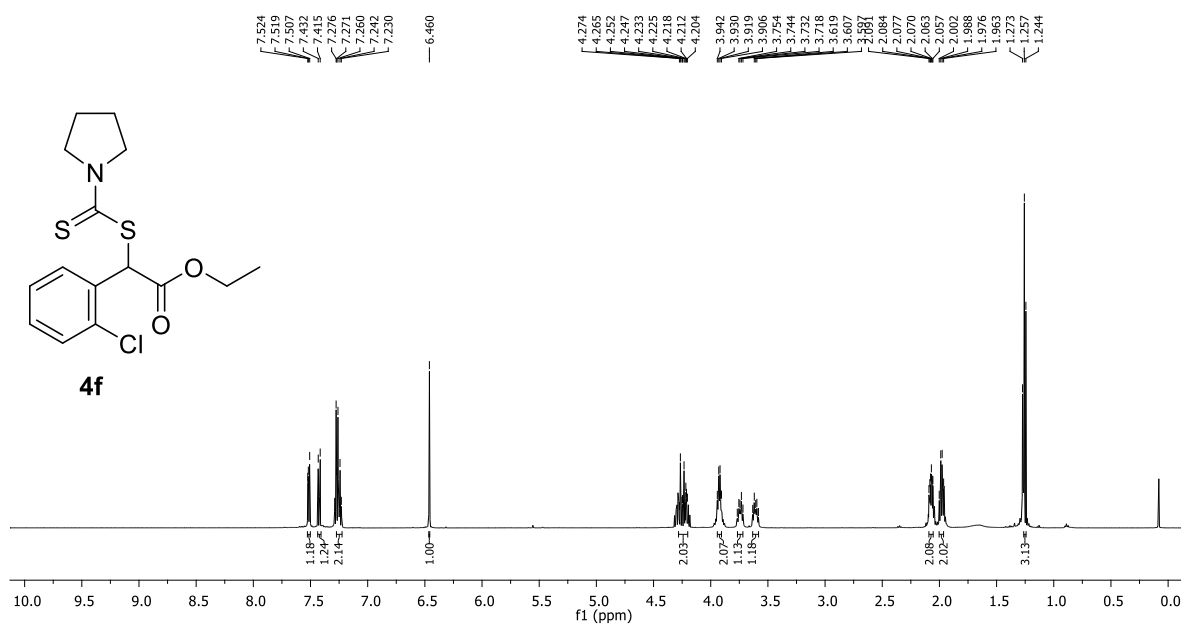

4f (500 MHz, NMR, CDCl<sub>3</sub>)

### <sup>13</sup>C NMR of Ethyl 2-(2-chlorophenyl)-2-((pyrrolidine-1-carbonothioyl)thio)acetate (4f):

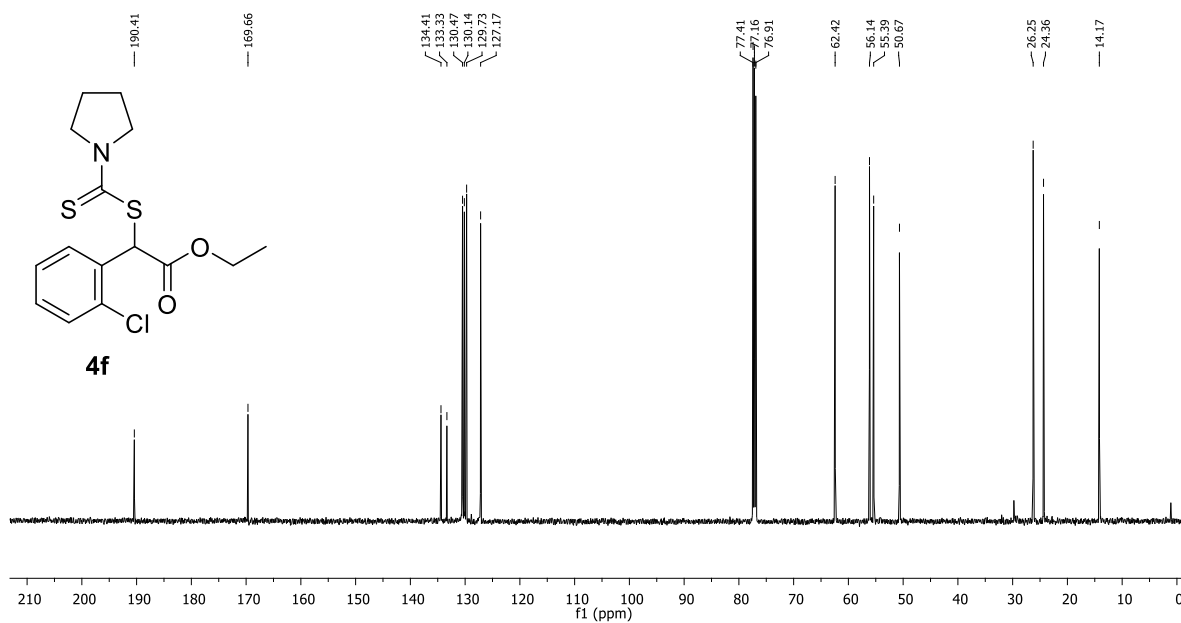

### <sup>1</sup>H NMR of Ethyl 2-(4-fluorophenyl)-2-((pyrrolidine-1-carbonothioyl)thio)acetate (4g):

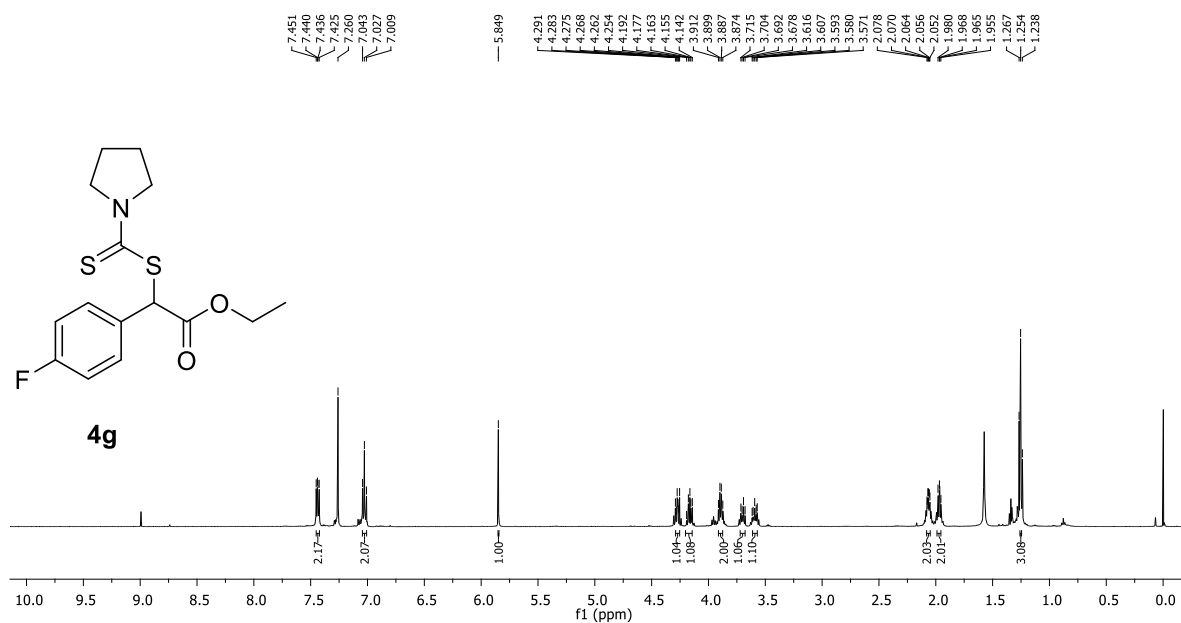

4g (500 MHz, NMR, CDCl<sub>3</sub>)

### <sup>13</sup>C NMR of Ethyl 2-(4-fluorophenyl)-2-((pyrrolidine-1-carbonothioyl)thio)acetate (4g):

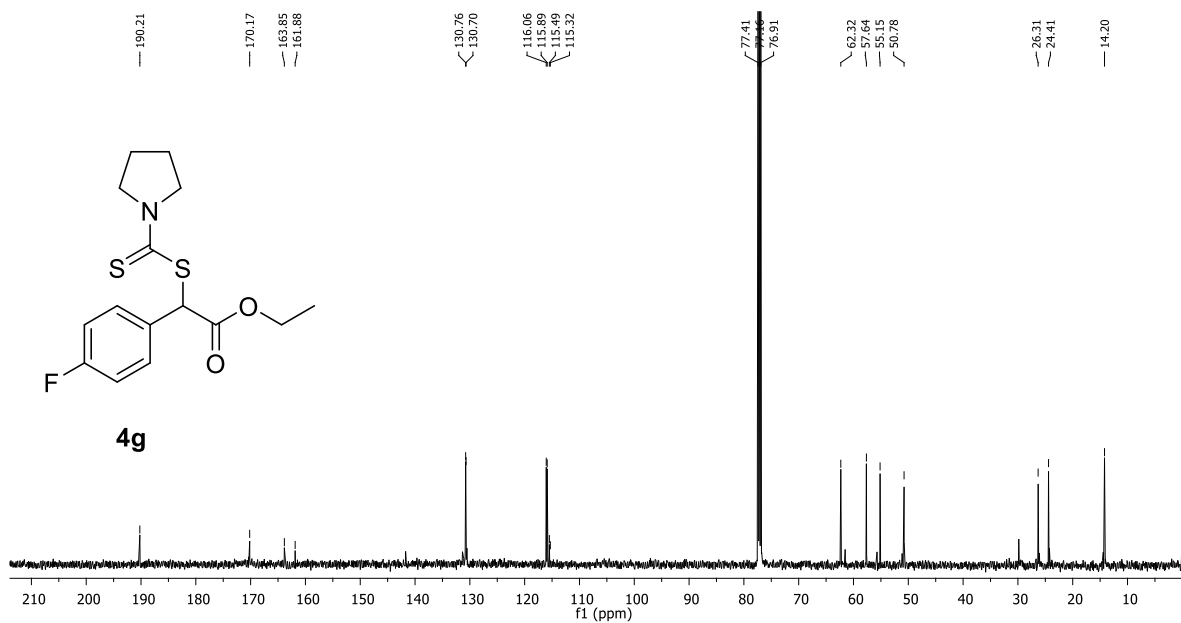

**<sup>19</sup>F NMR of Ethyl 2-(4-fluorophenyl)-2-((pyrrolidine-1-carbonothioyl)thio)acetate (4g):**  
**4g** (471 MHz, NMR, CDCl<sub>3</sub>)

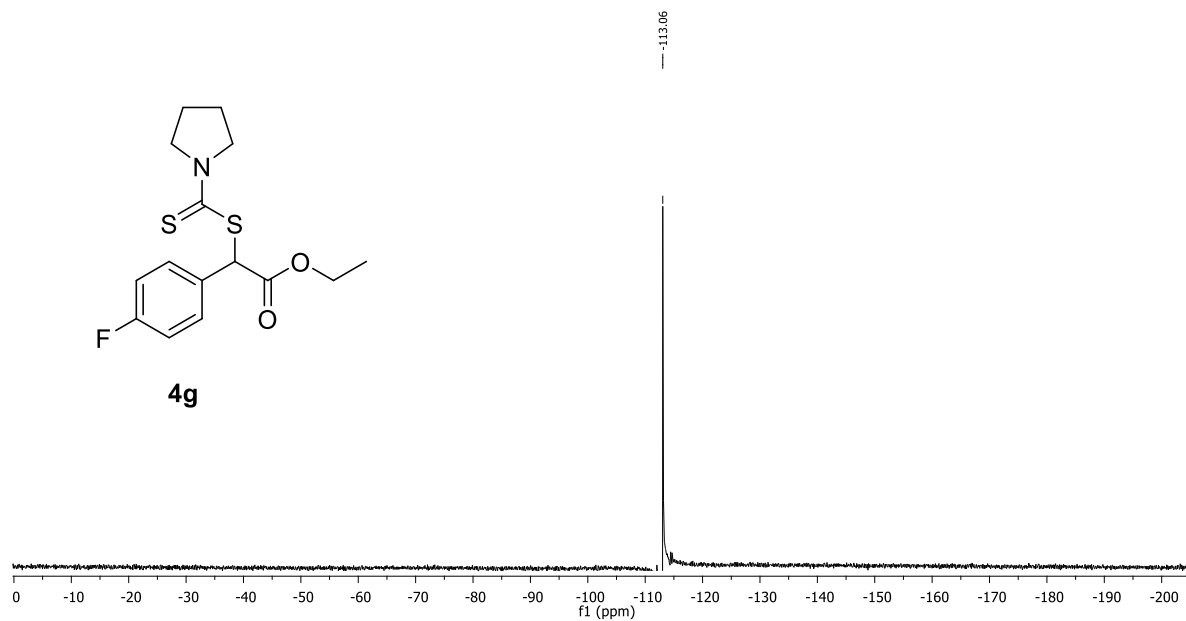

# <sup>1</sup>H NMR of Ethyl 2-(naphthalen-2-yl)-2-((pyrrolidine-1-carbonothioyl)thio)acetate (4h):

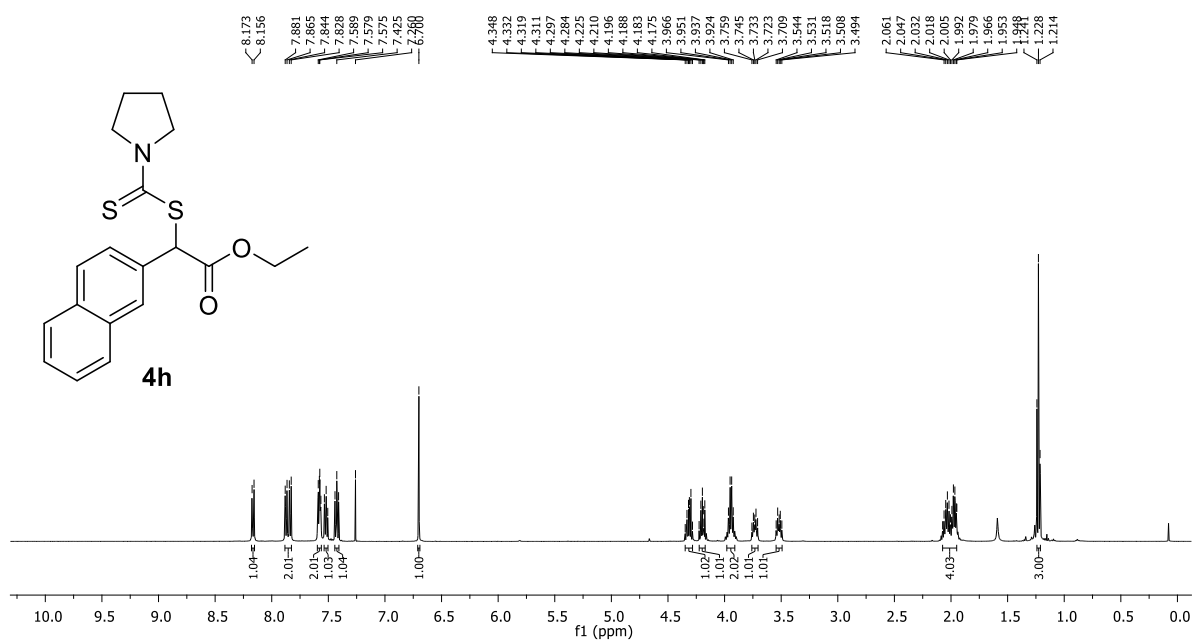

4h (500 MHz, NMR, CDCl<sub>3</sub>)

# <sup>13</sup>C NMR of Ethyl 2-(naphthalen-2-yl)-2-((pyrrolidine-1-carbonothioyl)thio)acetate (4h):

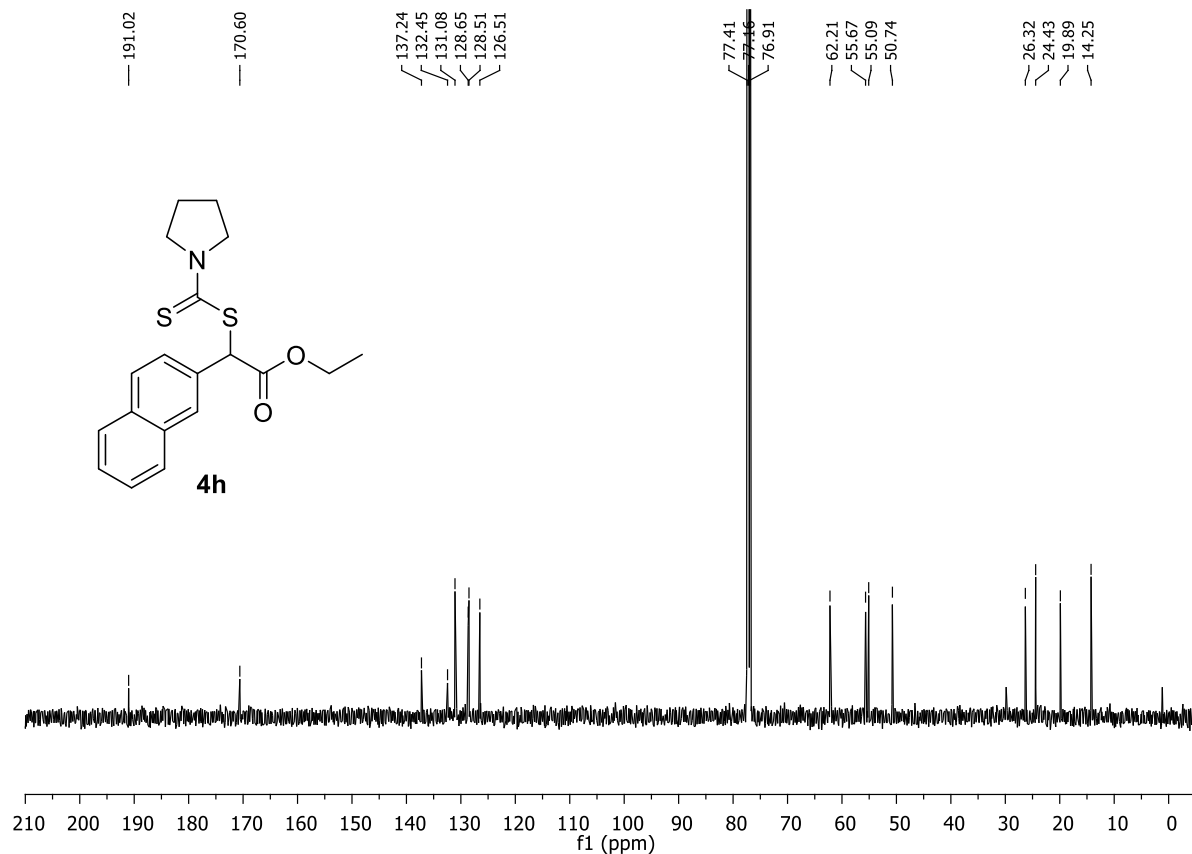

**<sup>1</sup>H NMR of Ethyl 2-([1,1'-biphenyl]-4-yl)-2-((pyrrolidine-1-carbonothioyl)thio)acetate (4i):**

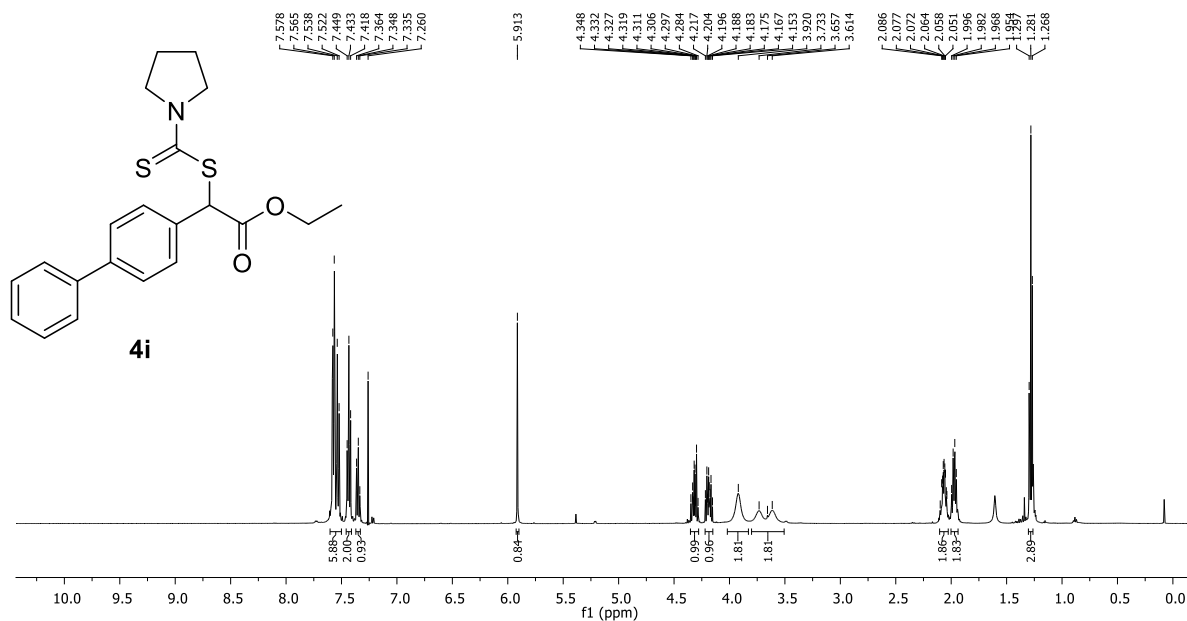

**4i** (500 MHz, NMR, CDCl<sub>3</sub>)

**<sup>13</sup>C NMR of Ethyl 2-([1,1'-biphenyl]-4-yl)-2-((pyrrolidine-1-carbonothioyl)thio)acetate (4i):**

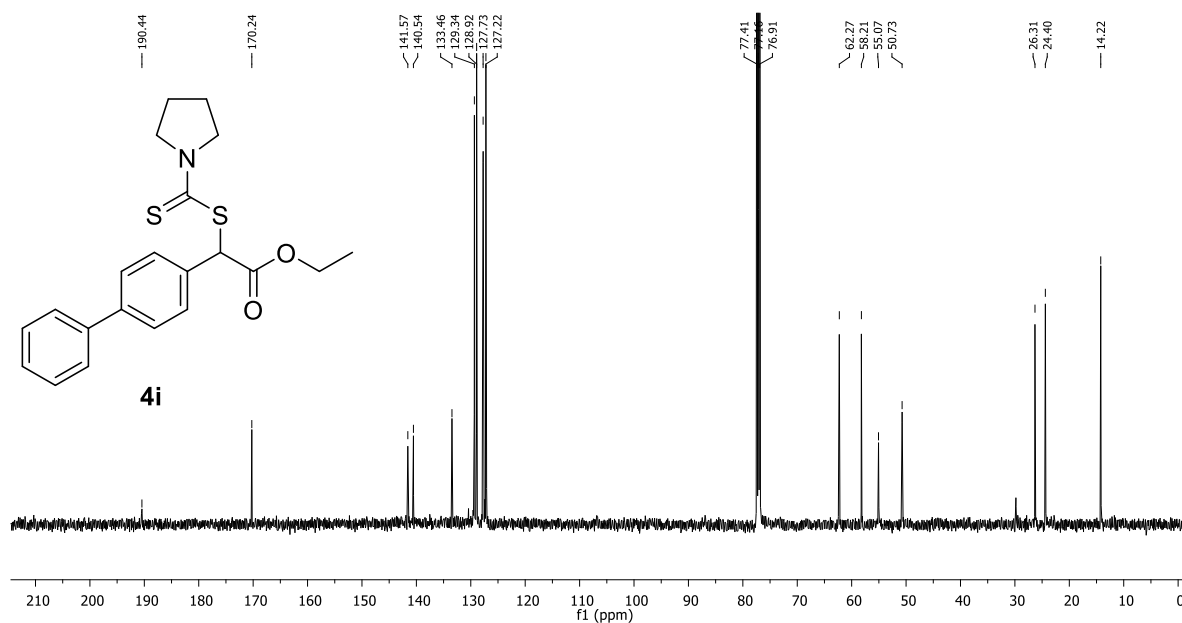

### $^1\text{H}$ NMR of Methyl 2-phenyl-2-((pyrrolidine-1-carbonothioyl)thio)acetate (**4j**):

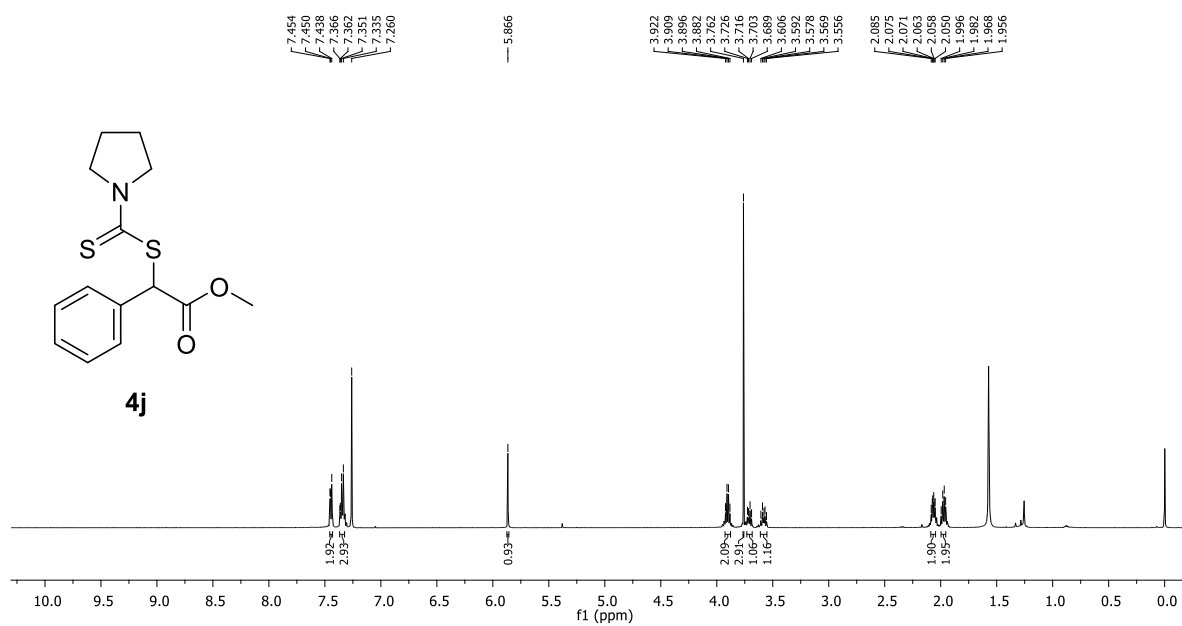

**4j** (500 MHz, NMR,  $\text{CDCl}_3$ )

### $^{13}\text{C}$ NMR of Methyl 2-phenyl-2-((pyrrolidine-1-carbonothioyl)thio)acetate (**4j**):

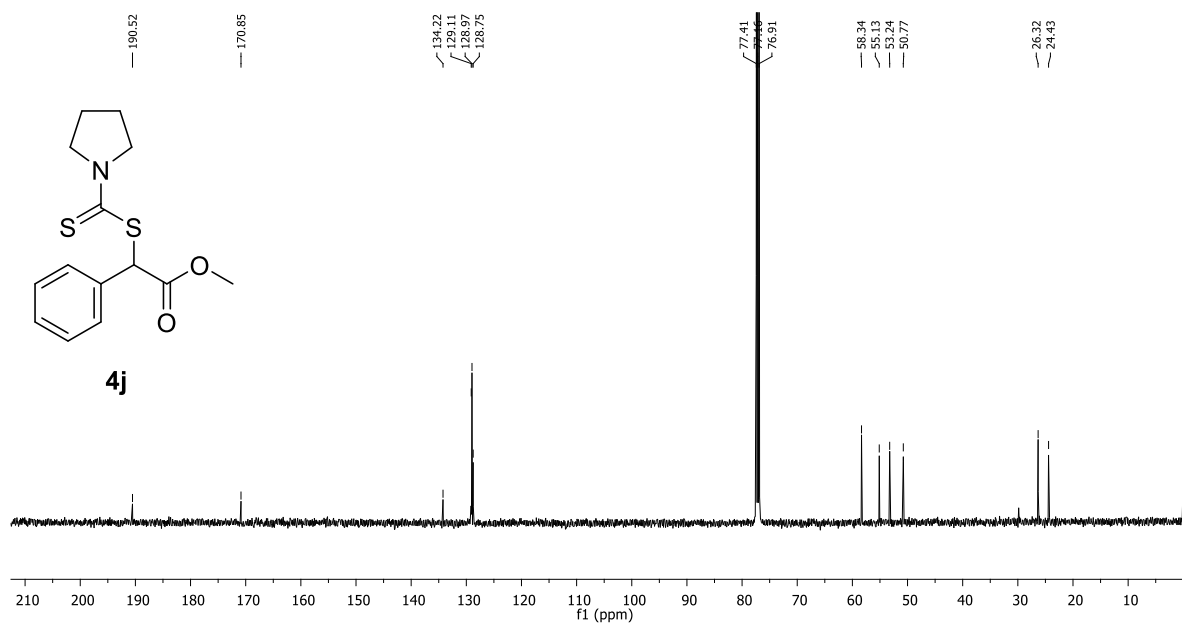



### <sup>1</sup>H NMR of Butyl 2-phenyl-2-((pyrrolidine-1-carbonthioyl)thio)acetate (4k):

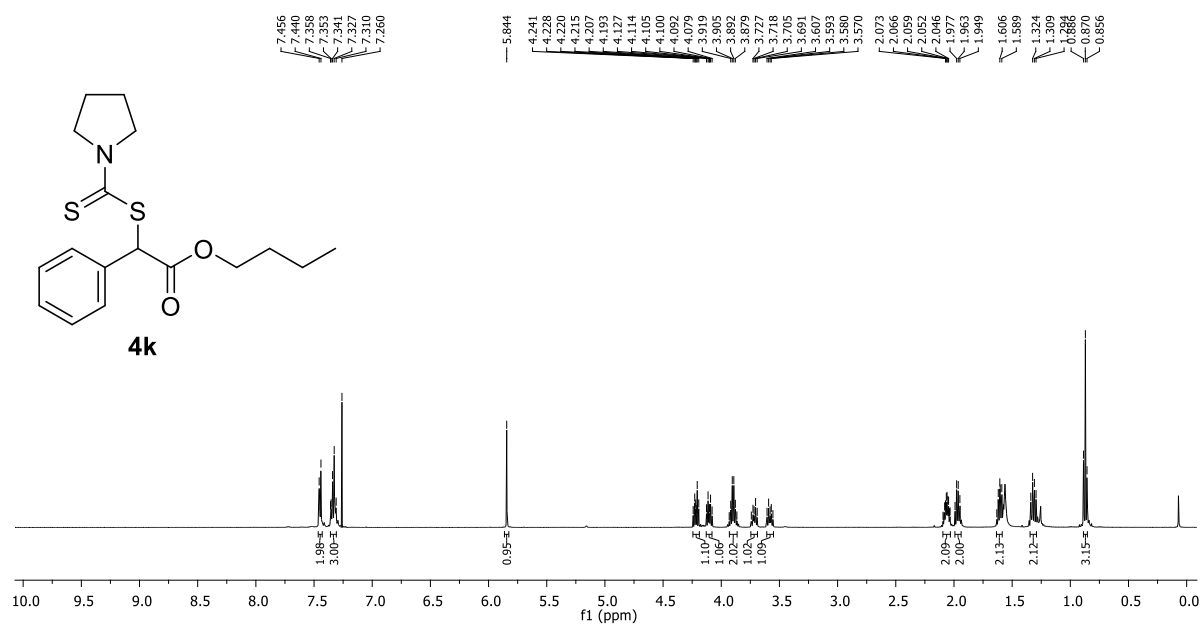

4k (500 MHz, NMR, CDCl<sub>3</sub>)

### <sup>13</sup>C NMR of Butyl 2-phenyl-2-((pyrrolidine-1-carbonthioyl)thio)acetate (4k):

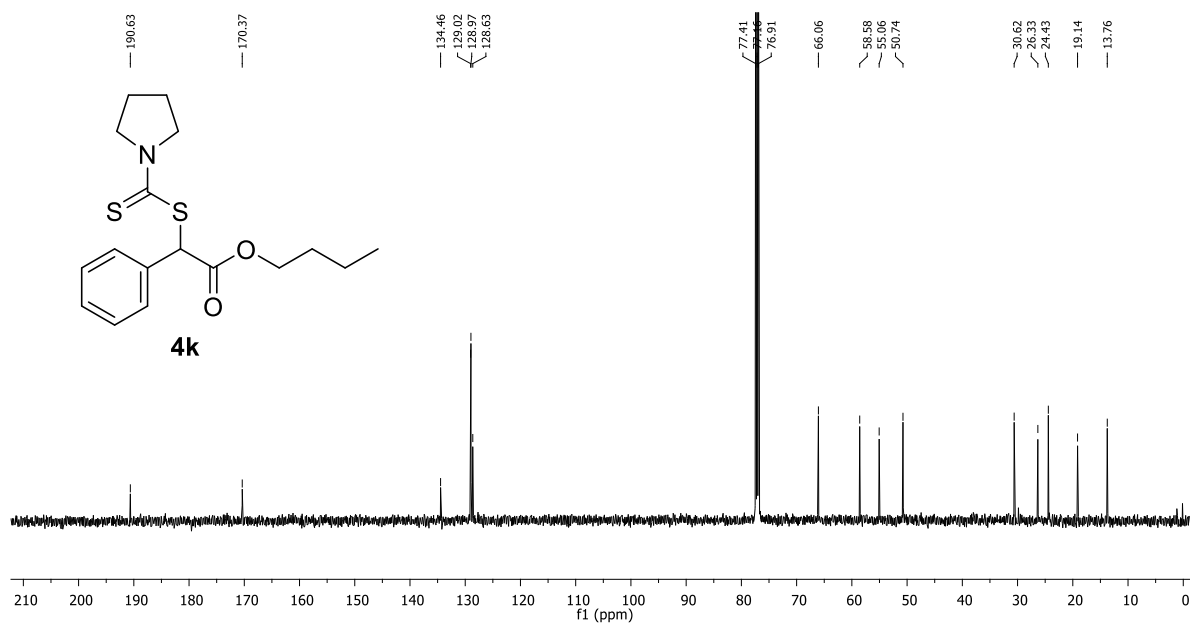

### <sup>1</sup>H NMR of Isopropyl 2-phenyl-2-((pyrrolidine-1-carbonothioyl)thio)acetate (4l):

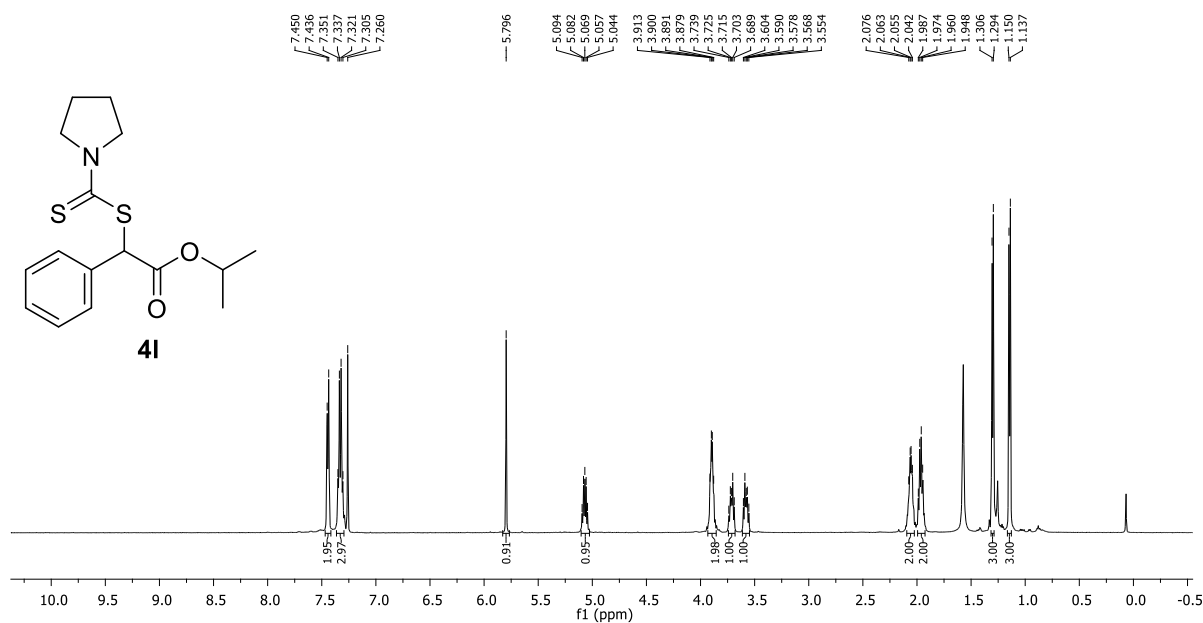

**4l** (500 MHz, NMR, CDCl<sub>3</sub>)

### <sup>13</sup>C NMR of Isopropyl 2-phenyl-2-((pyrrolidine-1-carbonothioyl)thio)acetate (4l):

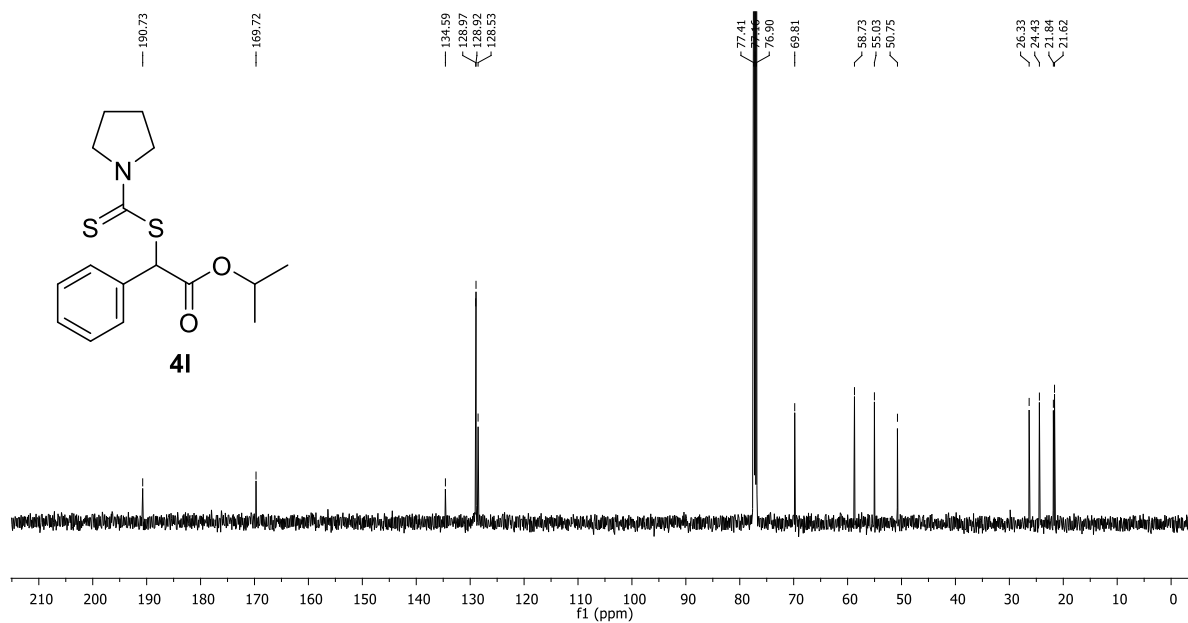

### <sup>1</sup>H NMR of Allyl 2-phenyl-2-((pyrrolidine-1-carbonothioyl)thio)acetate (4m):

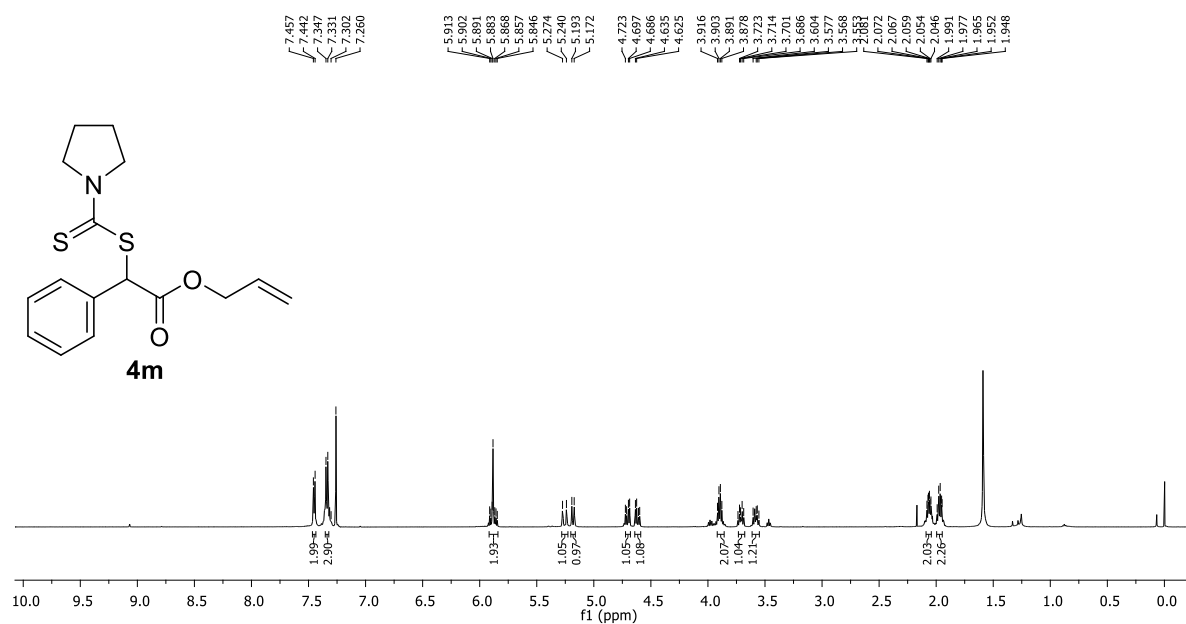

4m (500 MHz, NMR, CDCl<sub>3</sub>)

### <sup>13</sup>C NMR of Allyl 2-phenyl-2-((pyrrolidine-1-carbonothioyl)thio)acetate (4m):

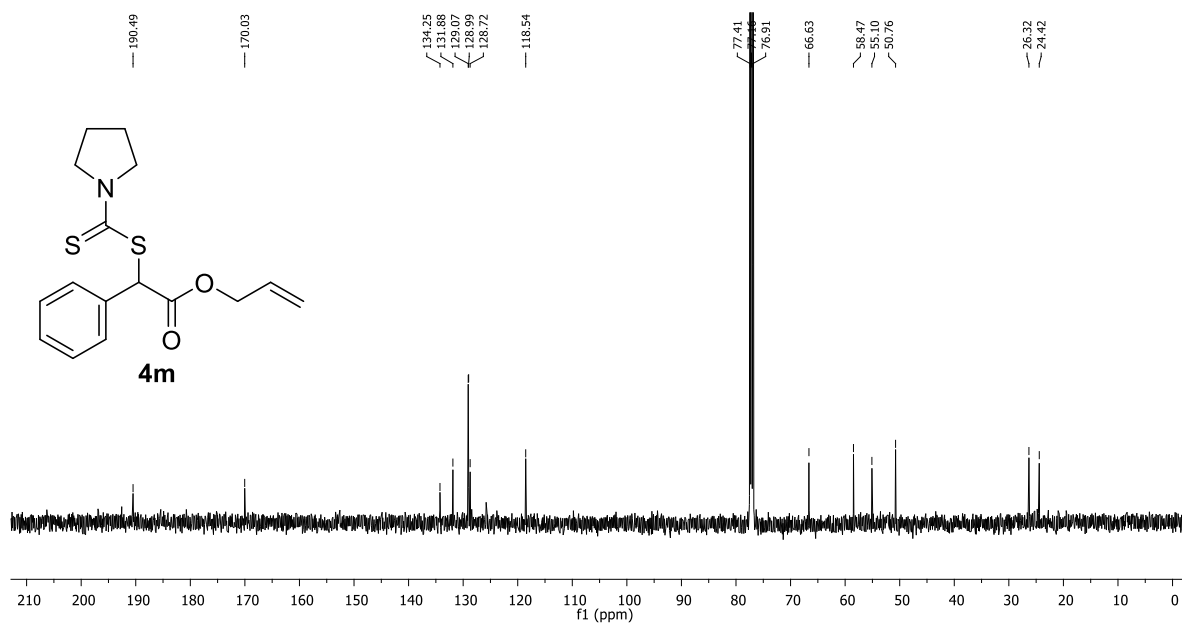

### <sup>1</sup>H NMR of Benzyl 2-phenyl-2-((pyrrolidine-1-carbonothioyl)thio)acetate (4n):

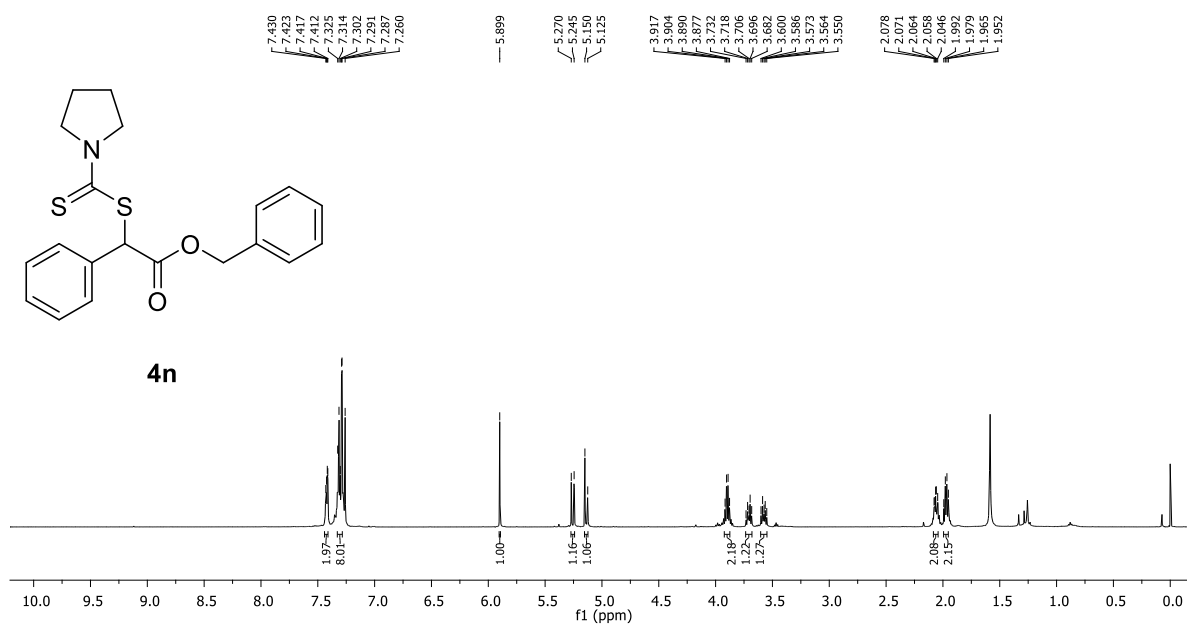

4n (500 MHz, NMR, CDCl<sub>3</sub>)

### <sup>13</sup>C NMR of Benzyl 2-phenyl-2-((pyrrolidine-1-carbonothioyl)thio)acetate (4n):

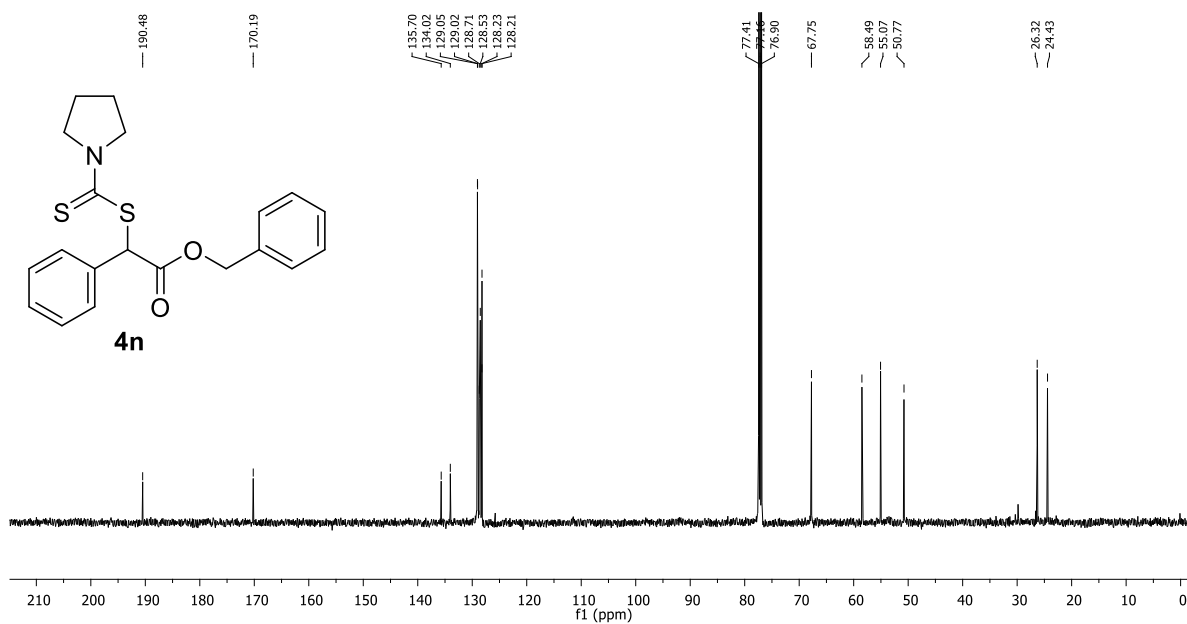

# <sup>1</sup>H NMR of Cyclohexyl 2-phenyl-2-((pyrrolidine-1-carbonothioyl)thio)acetate (4o):

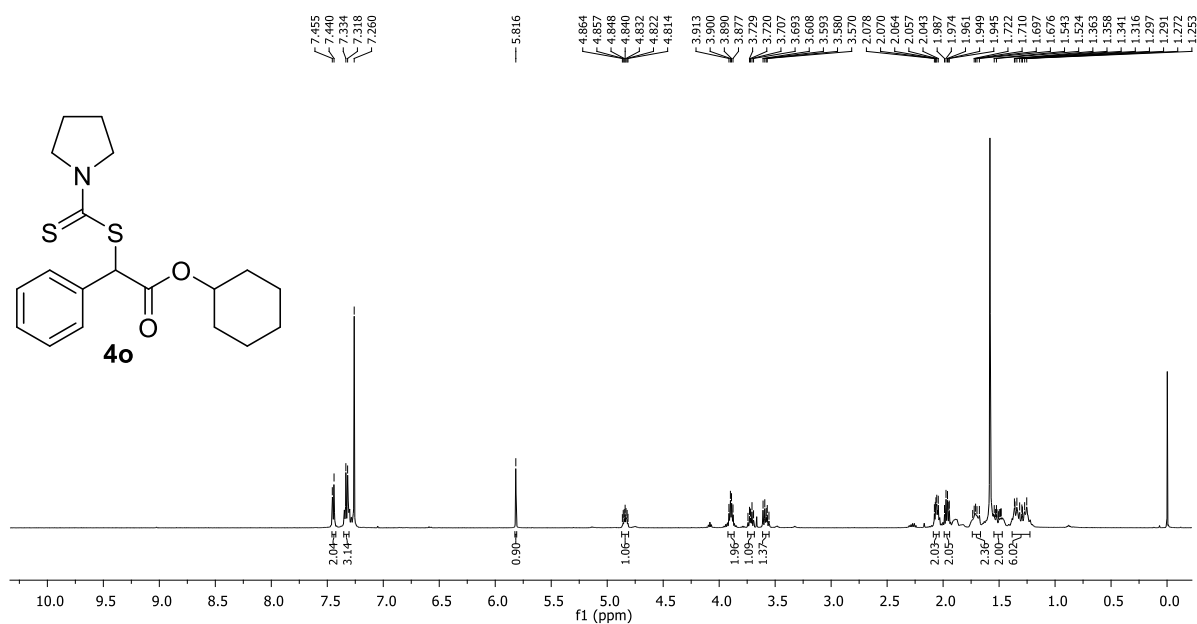

4o (500 MHz, NMR, CDCl<sub>3</sub>)

# <sup>13</sup>C NMR of Cyclohexyl 2-phenyl-2-((pyrrolidine-1-carbonothioyl)thio)acetate (4o):

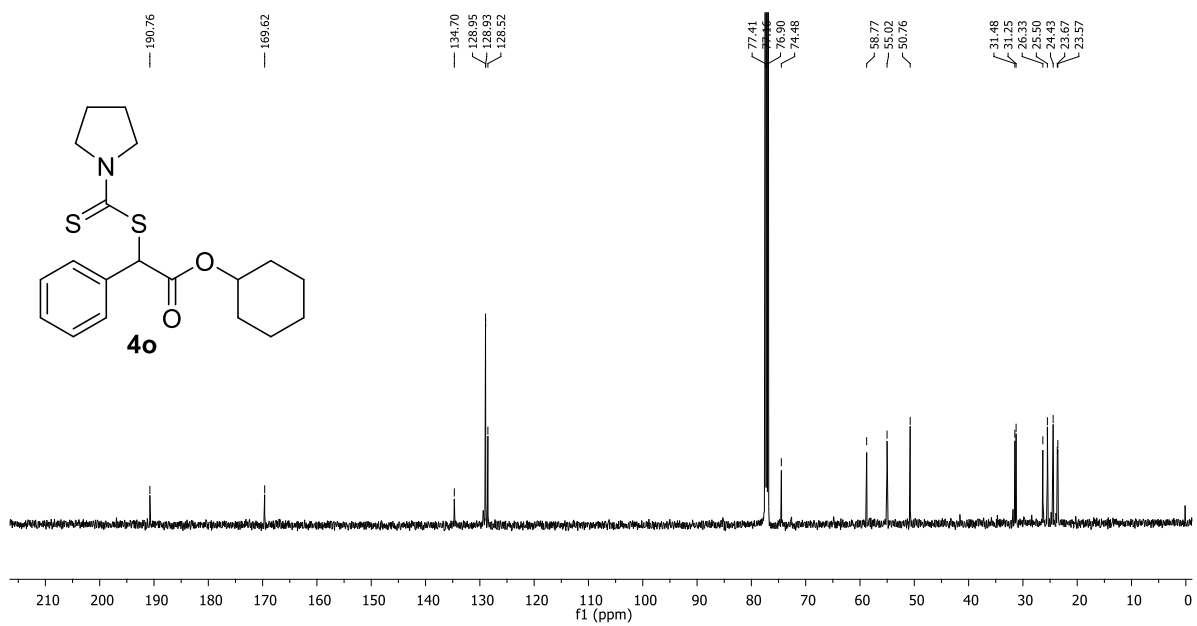

### <sup>1</sup>H NMR of Ethyl 2-phenyl-2-((piperidine-1-carbonothioyl)thio)acetate (4p):

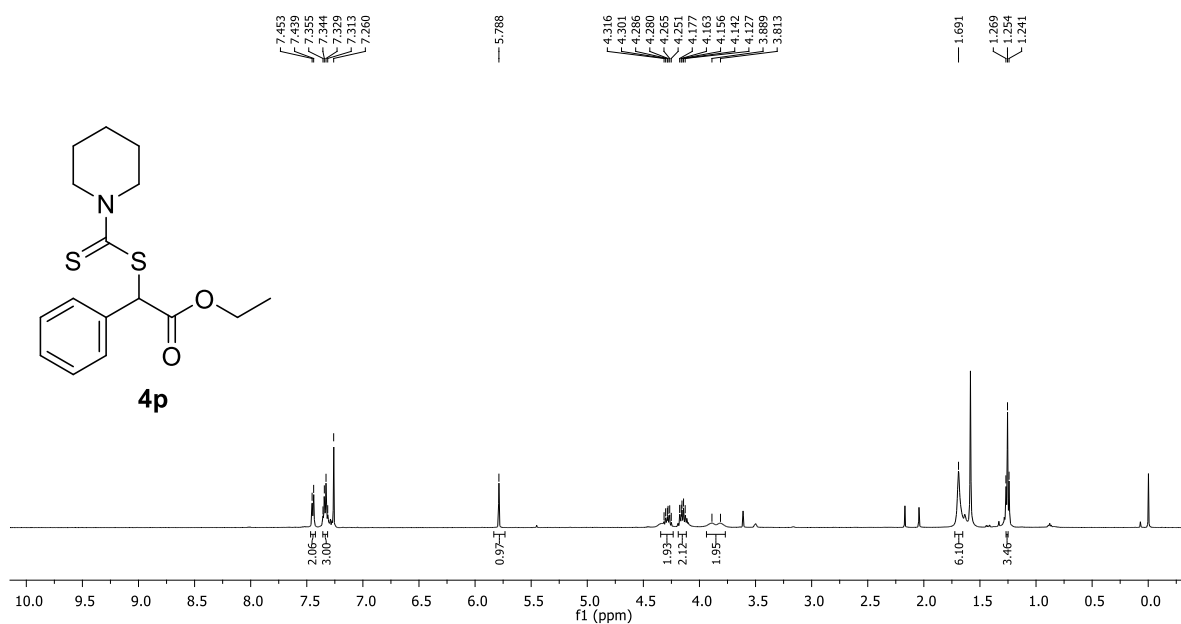

4p (500 MHz, NMR, CDCl<sub>3</sub>)

### <sup>13</sup>C NMR of Ethyl 2-phenyl-2-((piperidine-1-carbonothioyl)thio)acetate (4p):

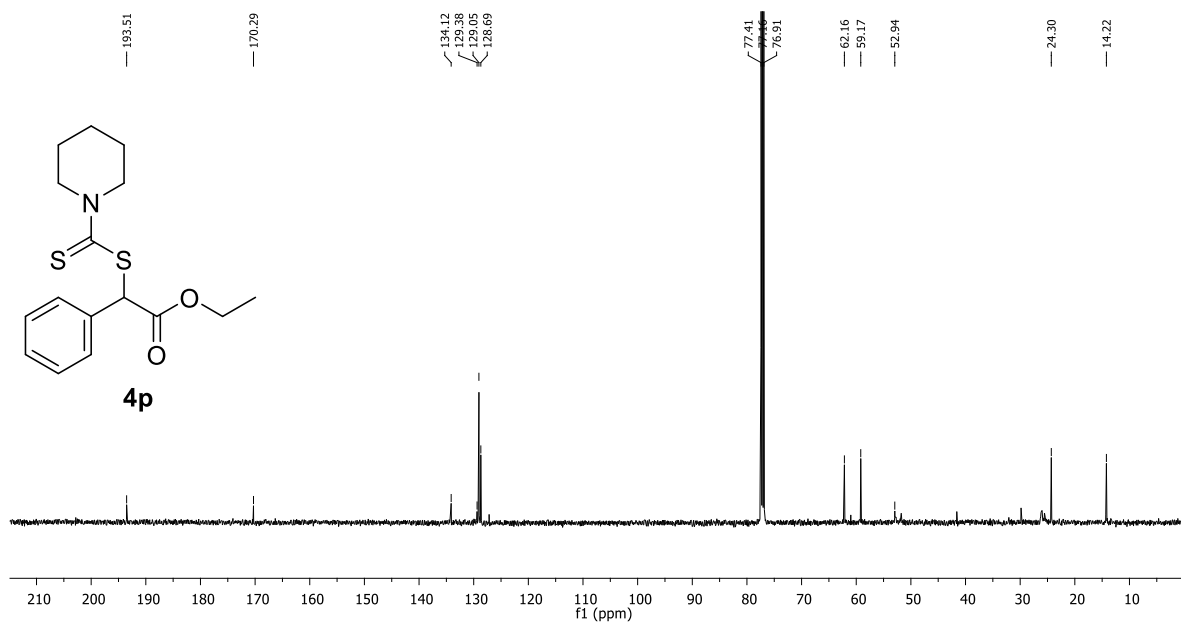

### <sup>1</sup>H NMR of Methyl 2-phenyl-2-((piperidine-1-carbonothioyl)thio)acetate (4q):

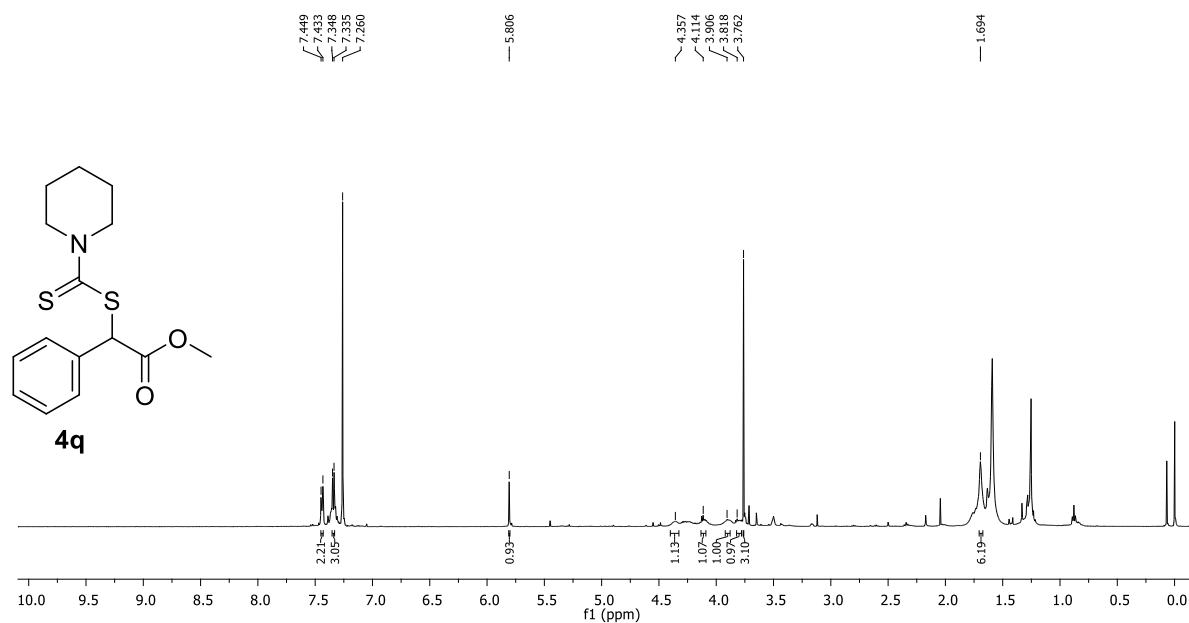

4q (500 MHz, NMR, CDCl<sub>3</sub>)

### <sup>13</sup>C NMR of Methyl 2-phenyl-2-((piperidine-1-carbonothioyl)thio)acetate (4q):

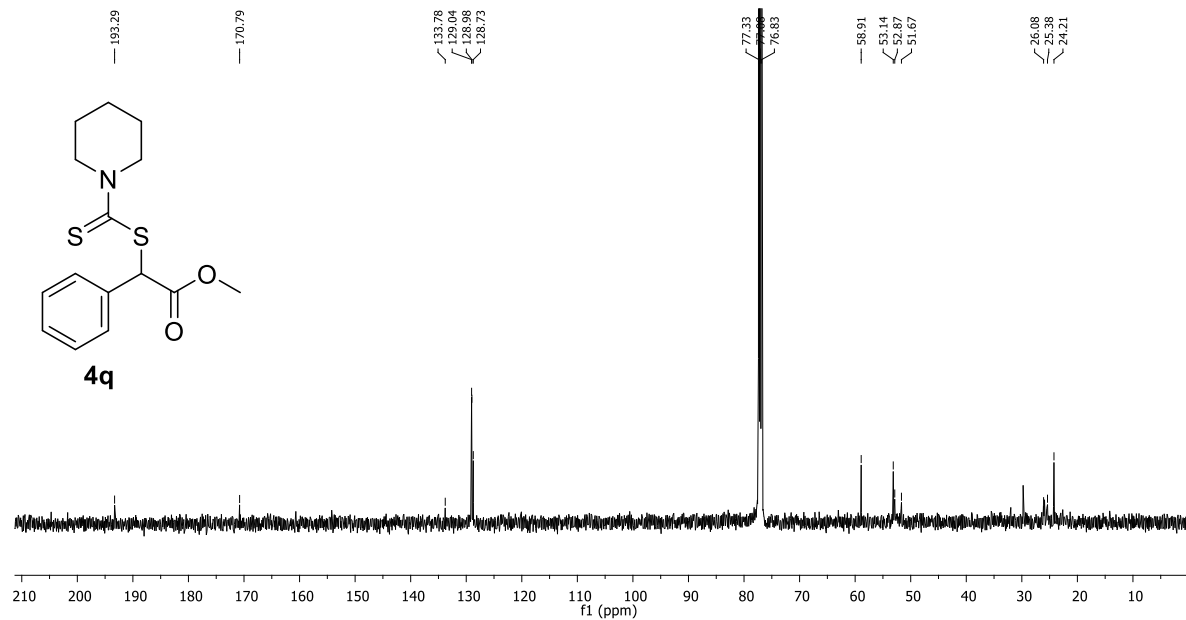

### <sup>1</sup>H NMR of Ethyl 2-((morpholine-4-carbonthioyl)thio)-2-phenylacetate (4r):

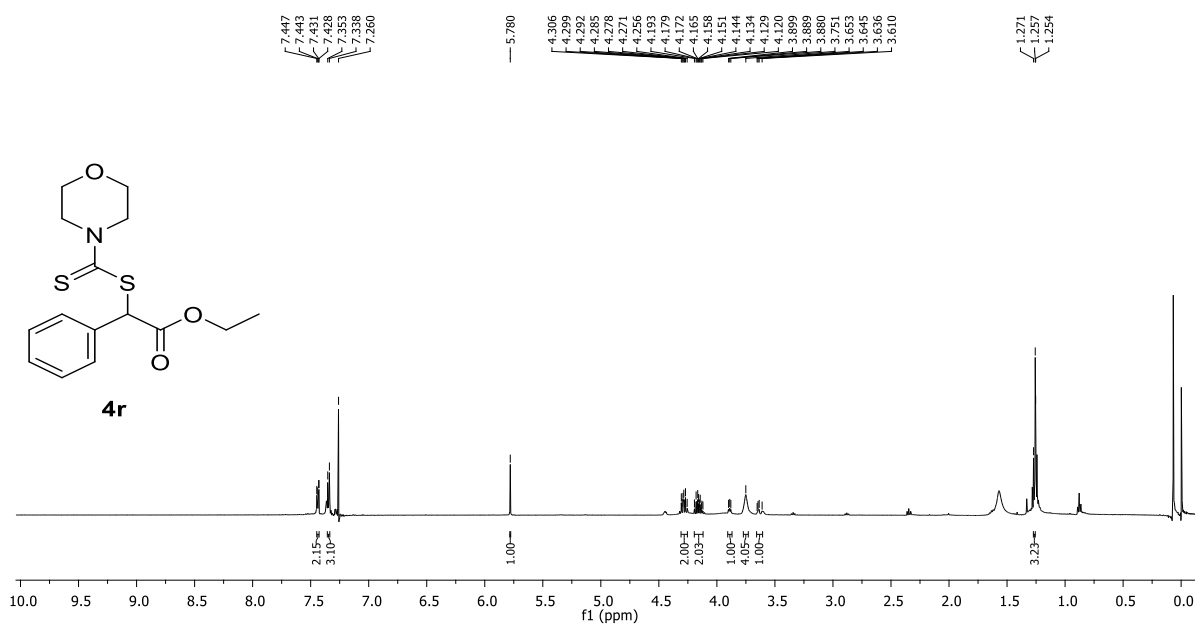

4r (500 MHz, NMR, CDCl<sub>3</sub>)

### <sup>13</sup>C NMR of Ethyl 2-((morpholine-4-carbonthioyl)thio)-2-phenylacetate (4r):

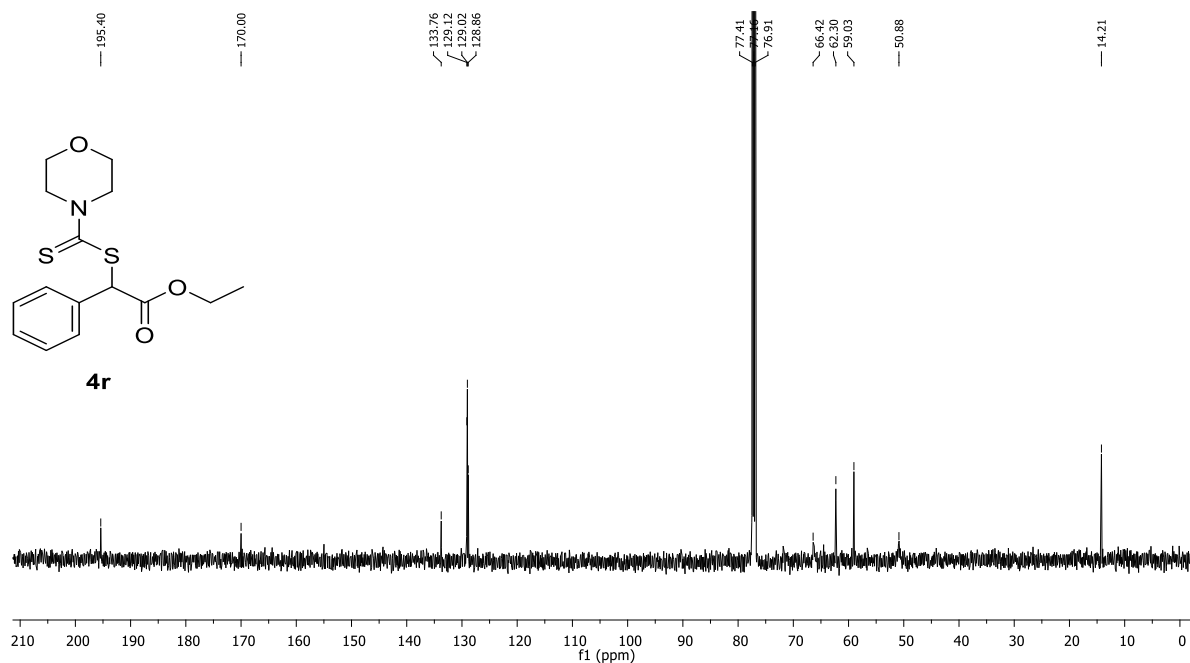



### $^1\text{H}$ NMR of Ethyl 2-((dimethylcarbamothioyl)thio)-2-phenylacetate (4s):

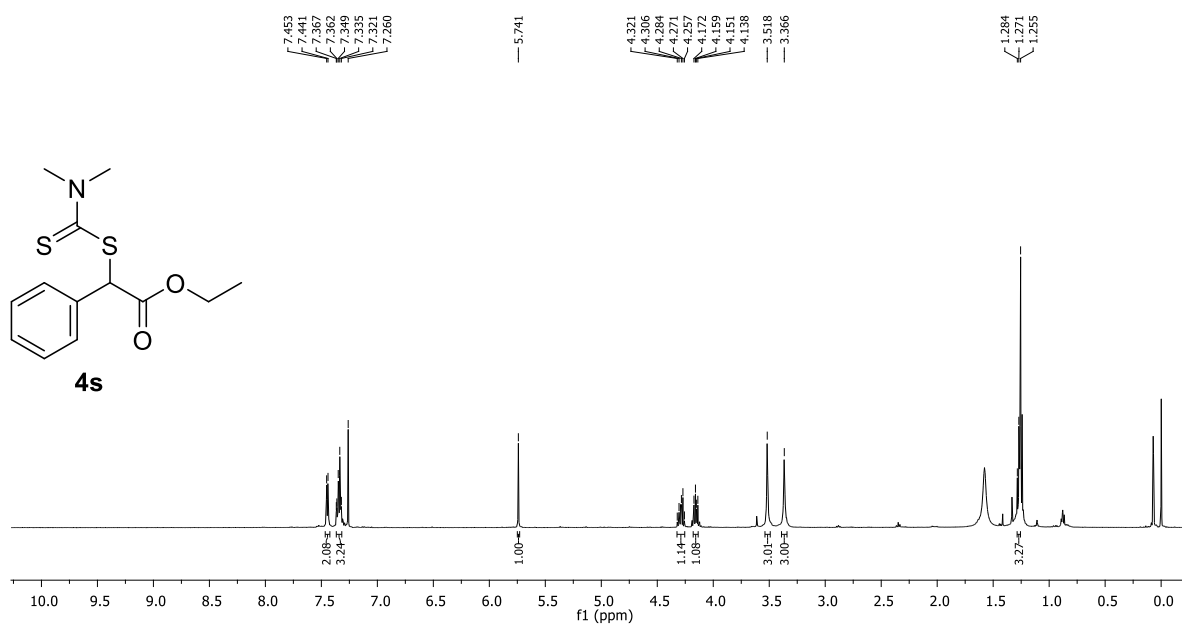

4s (500 MHz, NMR,  $\text{CDCl}_3$ )

### $^{13}\text{C}$ NMR of Ethyl 2-((dimethylcarbamothioyl)thio)-2-phenylacetate (4s):

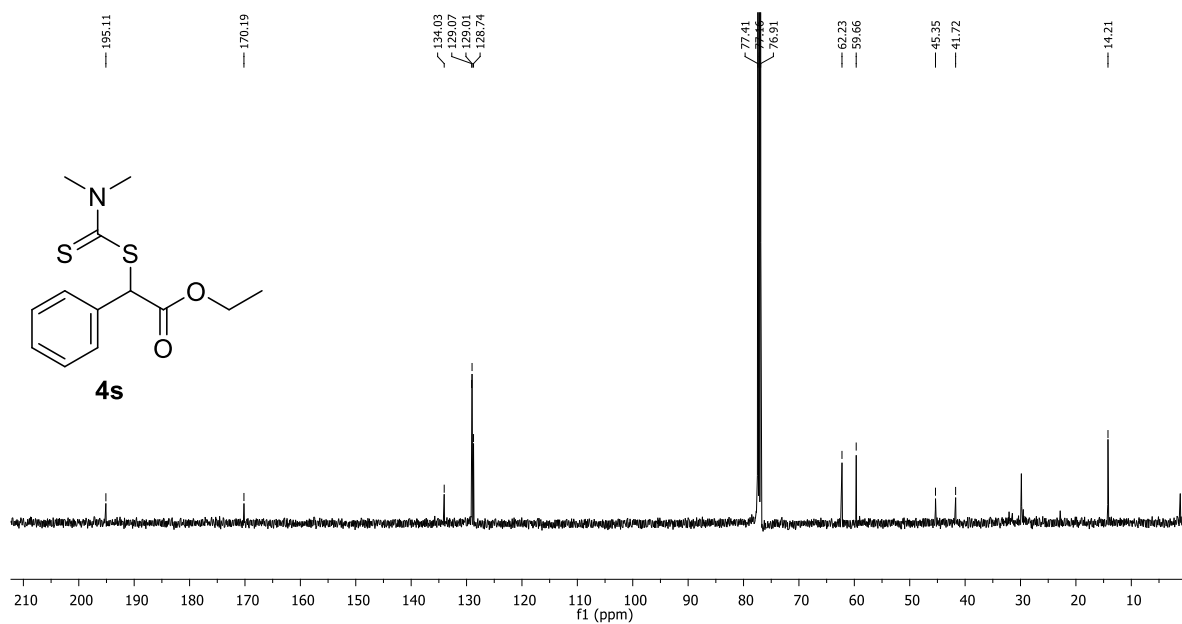

### <sup>1</sup>H NMR of Ethyl 2-((diethylcarbamothioyl)thio)-2-phenylacetate (4t):

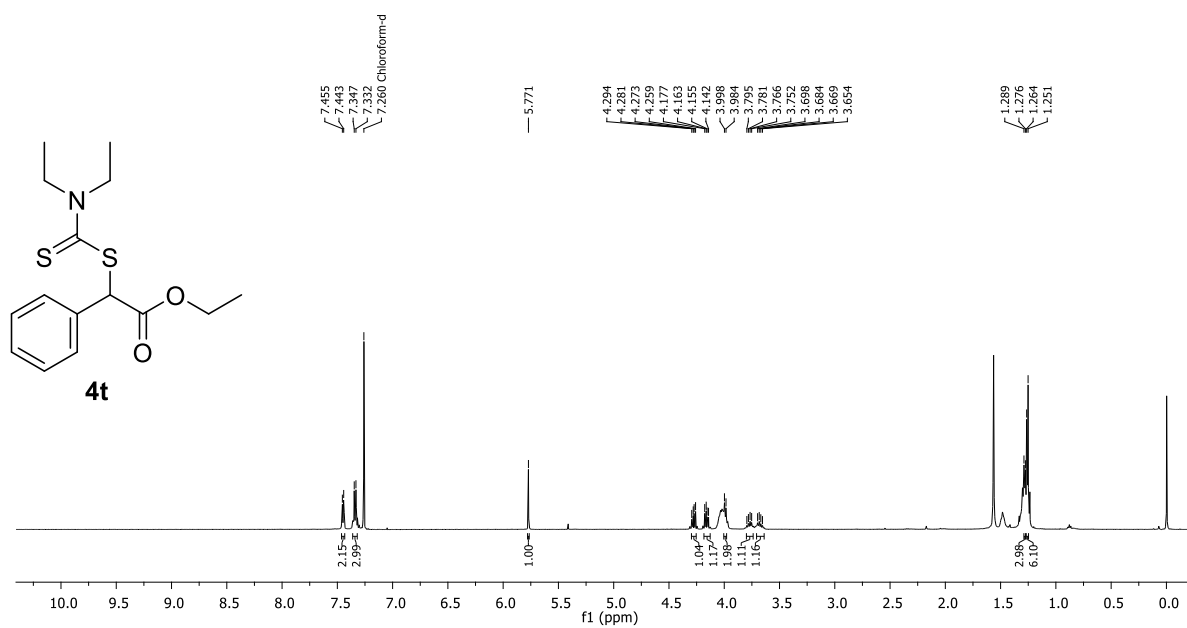

4t (500 MHz, NMR, CDCl<sub>3</sub>)

### <sup>13</sup>C NMR of Ethyl 2-((diethylcarbamothioyl)thio)-2-phenylacetate (4t):

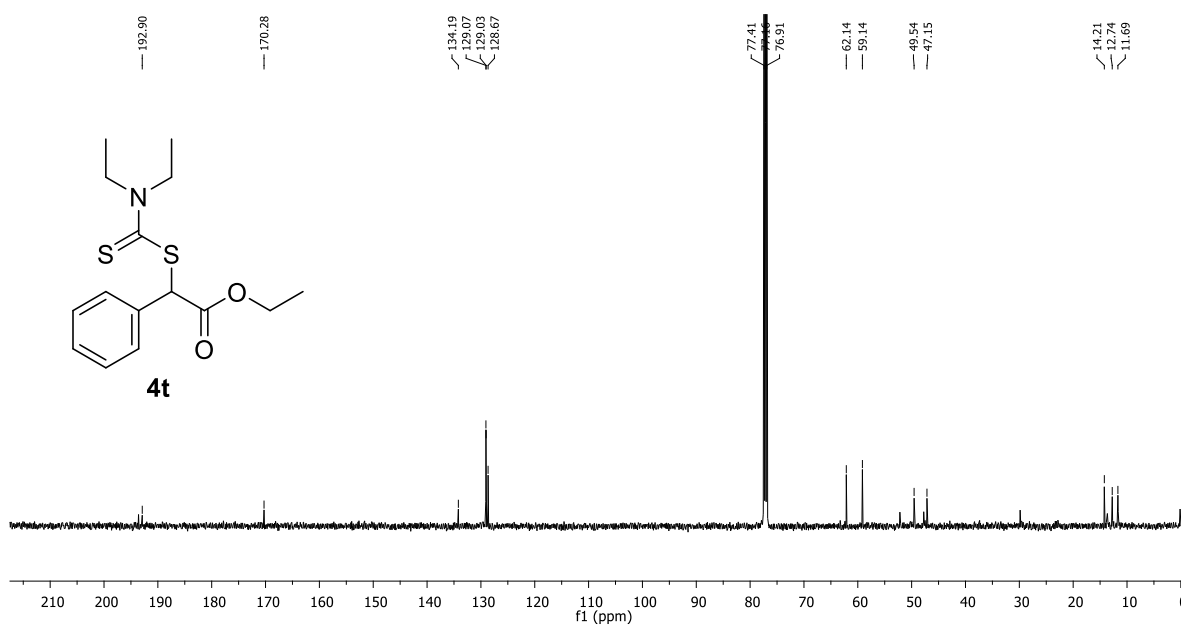

### $^1\text{H}$ NMR of Pyrrolidine-1-carbodithioic acid (A):

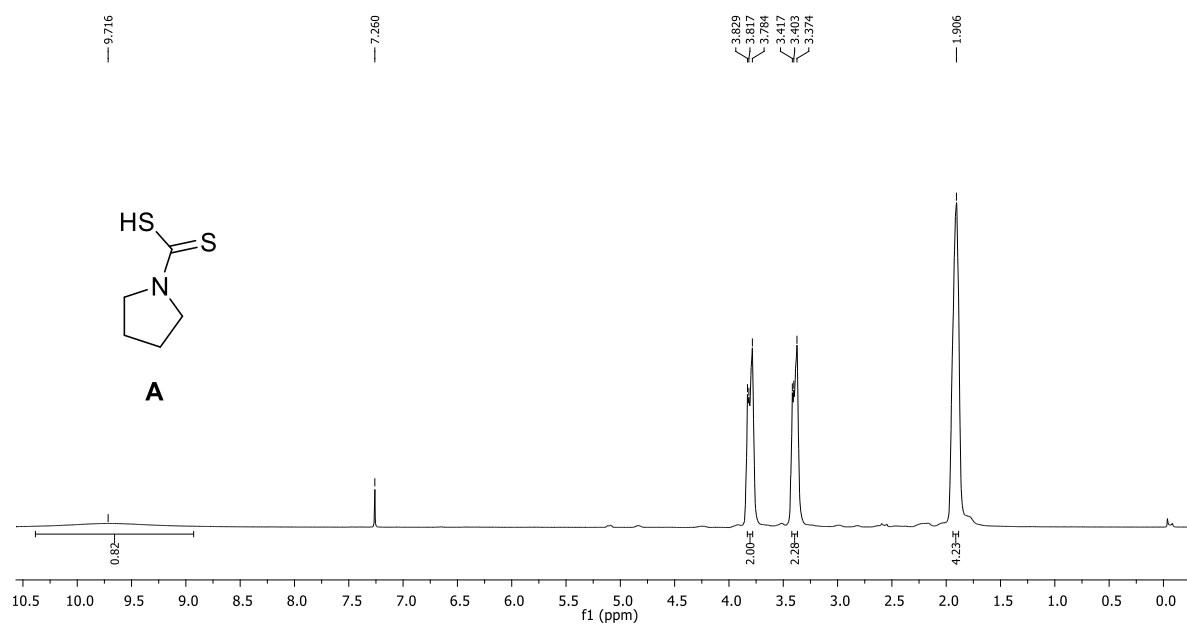

A (500 MHz, NMR,  $\text{CDCl}_3$ )

### $^{13}\text{C}$ NMR of Pyrrolidine-1-carbodithioic acid (A):

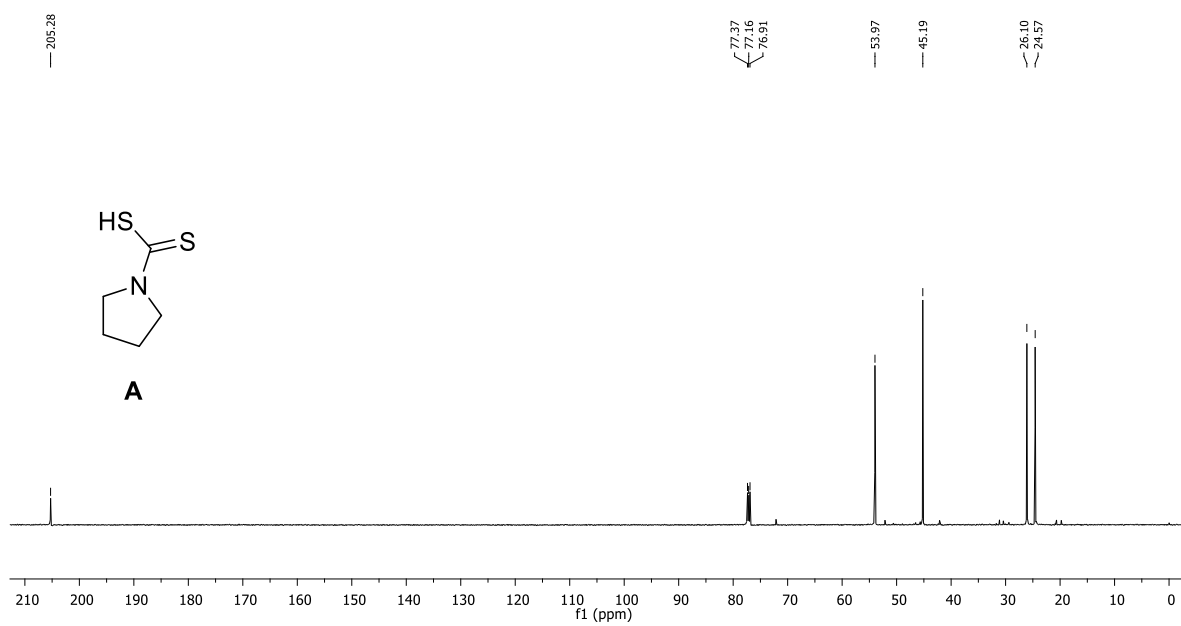

**7. HRMS of Pyrrolidine-1-carbodithioic acid (A) and pyrrolidine-1-carbothioic dithioperoxyanhydride (B): HRMS (TOF-MS) for  $C_5H_9NS_2$   $m/z$   $[M + K]^+ = 185.1119$  and  $C_{10}H_{16}N_2S_4$   $m/z$   $[M + K]^+ = 330.9828$ .**

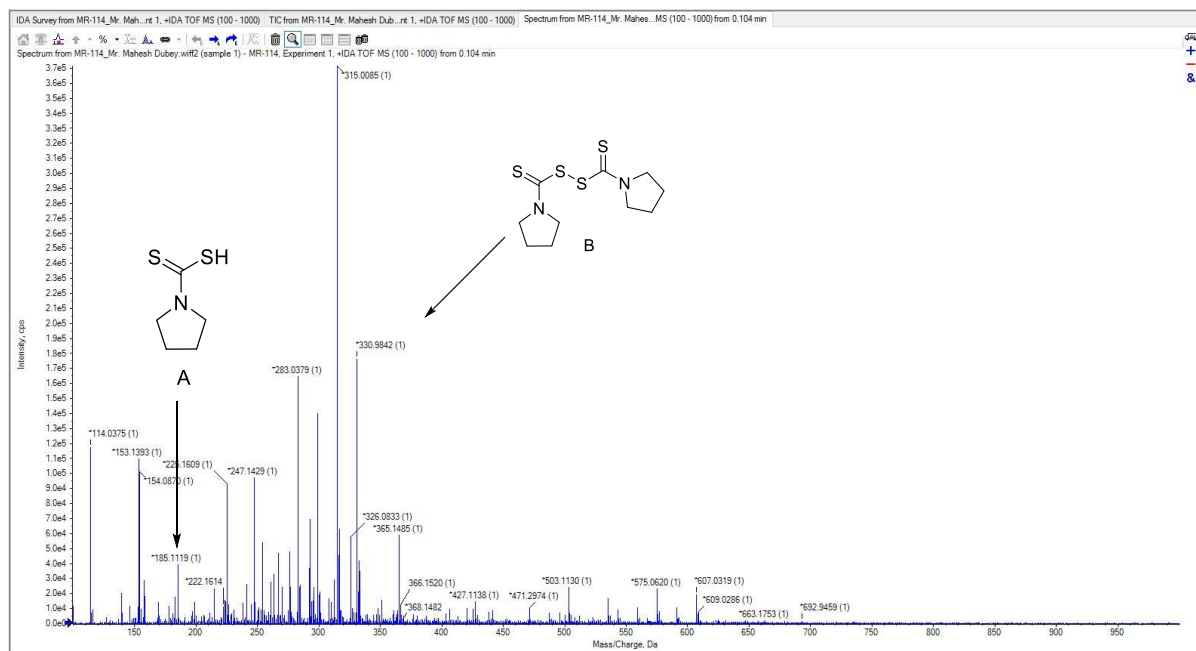

Supplement: d2nj05285g1.pdf [file d2nj05285g1.pdf]
